# Supplementary material for: High volatility of superbase-derived eutectic solvents used for CO2 capture
Source: Royal Society of Chemistry journal article supplement (doi:10.1039/d0cp05885h), 2020-12-08
Supplement: d0cp05885h1.pdf [file d0cp05885h1.pdf]

# Supporting Information

## High volatility of superbase-derived eutectic solvents used for CO<sub>2</sub> capture

Yu Chen<sup>\*a</sup>, Xiaohong Hu<sup>a</sup>, Wenjun Chen<sup>b</sup>, Chong Liu<sup>a</sup>, Kepan Qiao<sup>a</sup>, Meijing Zhu<sup>a</sup>, Yanyan Lou<sup>a</sup>,  
Tiancheng Mu<sup>\*b</sup>

<sup>a</sup> Department of Chemistry and Material Science, Langfang Normal University, Langfang 065000, Hebei, China

<sup>b</sup> Department of Chemistry, Renmin University of China, Beijing 100872, China

\* Yu Chen, E-mail: yuchen@iccas.ac.cn; Phone: +86-316-2188211; Fax: +86-316-2112462.

\* Tiancheng Mu, E-mail: tcmu@ruc.edu.cn; Phone: +86-10-62514925; Fax: +86-10-62516444.

## Contents

|                                                                                                                                                                                                                                                    |   |
|----------------------------------------------------------------------------------------------------------------------------------------------------------------------------------------------------------------------------------------------------|---|
| Figure S1. Entropy of surface formation ( $S^{\sigma}$ ) of superbase-derived ESs in the order from the highest at the top to the lowest at the bottom (a) and the effect of mol ratio/components (b).....                                         | 4 |
| Figure S2. Effect of temperature on enthalpy of surface formation ( $H^{\sigma}$ ) of superbase-derived ESs. PEG200:DBN (a), EG:DBU (b), PEG200:DBU (c) varying in mole ratio, 1:2 (d), 2:1 (e) and 4:1 mole ratio (f) varying in components. .... | 4 |
| Figure S3. Density of superbase-derived ESs at 25 °C in the order from the highest at the top to the lowest at the bottom (a) and the effect of mol ratio/components (b). ....                                                                     | 5 |
| Figure S4. Surface tension of superbase-derived ESs at 25 °C in the order from the highest at the top to the lowest at the bottom (a) and the effect of mol ratio/components (b). ....                                                             | 5 |
| Figure S5. Solubility parameter of superbase-derived ESs at 25 °C in the order from the highest at the top to the lowest at the bottom (a) and the effect of mol ratio/components (b).....                                                         | 6 |
| Table S1. Comparison of empirical constant (K) and critical temperature ( $T_c$ ) for superbase-derived ESs varying in mole ratio and components. ....                                                                                             | 7 |
| Table S2. Comparison of vaporization enthalpy and vapor pressure of representative superbase-derived ESs, ionic liquids and common organic solvents investigated at ca. 298.15 K. ....                                                             | 8 |
| Table S3. Evaporation rate $dm/dt$ , molecular weight $M$ , $v$ and vapor pressure $p$ of EG at different temperature $T$ . ....                                                                                                                   | 9 |

|                                                                                                                                                                                                                                                                                                                                     |    |
|-------------------------------------------------------------------------------------------------------------------------------------------------------------------------------------------------------------------------------------------------------------------------------------------------------------------------------------|----|
| Table S4. Mass loss of EG:DBU (4:1) at 1 h as the short-term volatility and at 20 h as the long-term volatility as a function of temperature. ....                                                                                                                                                                                  | 9  |
| Figure S6. Mass of EG:DBU (4:1) as a function of time at 25 °C to 65 °C in the interval of 10 °C by TGA in the first 60 min (isothermal mode, nitrogen gas, platinum pan, skipped 100 points). These lines are the linear fitted lines for the purpose of obtaining $dm/dt$ . ....                                                  | 10 |
| Table S5. Evaporation rate $dm/dt$ of EG:DBU (4:1) as a function of temperature and the corresponding linearly fitted equation. ....                                                                                                                                                                                                | 11 |
| Table S6. Vapor pressure of EG:DBU (4:1) as a function of temperature. <sup>a</sup> ....                                                                                                                                                                                                                                            | 11 |
| Figure S7. IR spectra of EG, DBU and EG:DBU (4:1) with converged comparison (a) and separately assignment (b). ....                                                                                                                                                                                                                 | 12 |
| Figure S8. IR difference spectra (DS) of EG:DBU (4:1) in the first 16 min. ....                                                                                                                                                                                                                                                     | 13 |
| Figure S9. Normalized IR difference spectra (DS) of EG:DBU (4:1) at 4 min and at the end (248 min). ....                                                                                                                                                                                                                            | 13 |
| Figure S10. Shift of IR peak in difference spectra (DS) of EG:DBU (4:1) as a function of time. ....                                                                                                                                                                                                                                 | 14 |
| Figure S11. Expanded shift of IR peak in difference spectra (DS) of EG:DBU (4:1) as a function of time during the first 100 min. ....                                                                                                                                                                                               | 14 |
| Figure S12. IR spectra of EG (a) and DBU (b) exposed to the air at the beginning at 0 min and at the end at 248 min. ....                                                                                                                                                                                                           | 15 |
| Table S7. IR peaks of EG:DBU (4:1), EG:DBU (4:1)+CO <sub>2</sub> at the beginning and at the end. <sup>a</sup> ....                                                                                                                                                                                                                 | 16 |
| Table S8. Calculated IR spectra of EG, EG/EG (1:1), DBU and EG:DBU (1:1) by DFT B3LYP/6-31++G(d, p) method. <sup>24</sup> ....                                                                                                                                                                                                      | 17 |
| Figure S1. Calculated Mulliken charge (a), APT charge (b) and O-H bond length (c) of EG by DFT B3LYP/6-31++G(d, p) method. Black and blue numbers are charge and bond length, respectively. ....                                                                                                                                    | 20 |
| Figure S2. Calculated Mulliken charge (a) APT charge (b) and O-H bond length (c) of EG/EG (1:1) by DFT B3LYP/6-31++G(d, p) method. Black, blue and red numbers are charge, intramolecular bond length and intermolecular hydrogen-bond length, respectively. The intermolecular hydrogen-bond is also marked with dashed line. .... | 21 |
| Figure S3. Calculated Mulliken charge (a), APT charge (b) and C-N bond length (c) of DBU by DFT B3LYP/6-31++G(d, p) method. Black and blue numbers are charge and bond length, respectively. ....                                                                                                                                   | 22 |
| Figure S4. Calculated Mulliken charge (a), APT charge (b) and bond length (c) of EG:DBU (1:1) by DFT B3LYP/6-31++G(d, p) method. Black, blue and red numbers are charge, intramolecular bond length and intermolecular hydrogen-bond length, respectively. The intermolecular hydrogen-bond is also marked with dashed line. ....   | 23 |
| Figure S5. Calculated Mulliken charge (a), APT charge (b) and bond length (c) of EG:DBU (2:1) by DFT B3LYP/6-31++G(d, p) method. Black, blue and red numbers are charge, intramolecular bond length and intermolecular hydrogen-bond length, respectively. The intermolecular hydrogen-bond is also marked with dashed line. ....   | 24 |

|                                                                                                                                                                                         |    |
|-----------------------------------------------------------------------------------------------------------------------------------------------------------------------------------------|----|
| <b>Figure S6. Comparison of calculated infrared spectra of EG and EG/EG (1:1) by DFT B3IYP/6-31++G(d, p) method. Separate comparison (a) and converged comparison (b).</b> .....        | 25 |
| <b>Figure S7. Comparison of calculated infrared spectra of EG, DBU and EG:DBU (1:1) by DFT B3IYP/6-31++G(d, p) method. Separate comparison (a) and converged comparison (b).</b> .....  | 26 |
| <b>Table S9. Cartesian coordinates of all the optimized species by the Gaussian calculation (i.e., output file) for EG by DFT B3IYP/6-31++G(d, p) method.</b> .....                     | 27 |
| <b>Table S10. Cartesian coordinates of all the optimized species by the Gaussian calculation (i.e., output file) for DBU by DFT B3IYP/6-31++G(d, p) method.</b> .....                   | 28 |
| <b>Table S11. Cartesian coordinates of all the optimized species by the Gaussian calculation (i.e., output file) for EG/EG (1:1) by DFT B3IYP/6-31++G(d, p) method.</b> .....           | 30 |
| <b>Table S12. Cartesian coordinates of all the optimized species by the Gaussian calculation (i.e., output file) for DBU/DBU (1:1) by DFT B3IYP/6-31++G(d, p) method.</b> .....         | 32 |
| <b>Table S13. Cartesian coordinates of all the optimized species by the Gaussian calculation (i.e., output file) for EG:DBU (1:1) by DFT B3IYP/6-31++G(d, p) method.</b> .....          | 36 |
| <b>Table S14. Cartesian coordinates of all the optimized species by the Gaussian calculation (i.e., output file) for EG:DBU (2:1) by DFT B3IYP/6-31++G(d, p) method.</b> .....          | 39 |
| <b>Table S15. Comparison of interaction enthalpy energy for EG/EG (1:1), DBU:DBU (1:1), EG:DBU (1:1) and EG:DBU (2:1) via Gaussian calculation by B3LYP/6-31++g(d, p) method.</b> ..... | 43 |
| <b>References:</b>                                                                                                                                                                      | 44 |

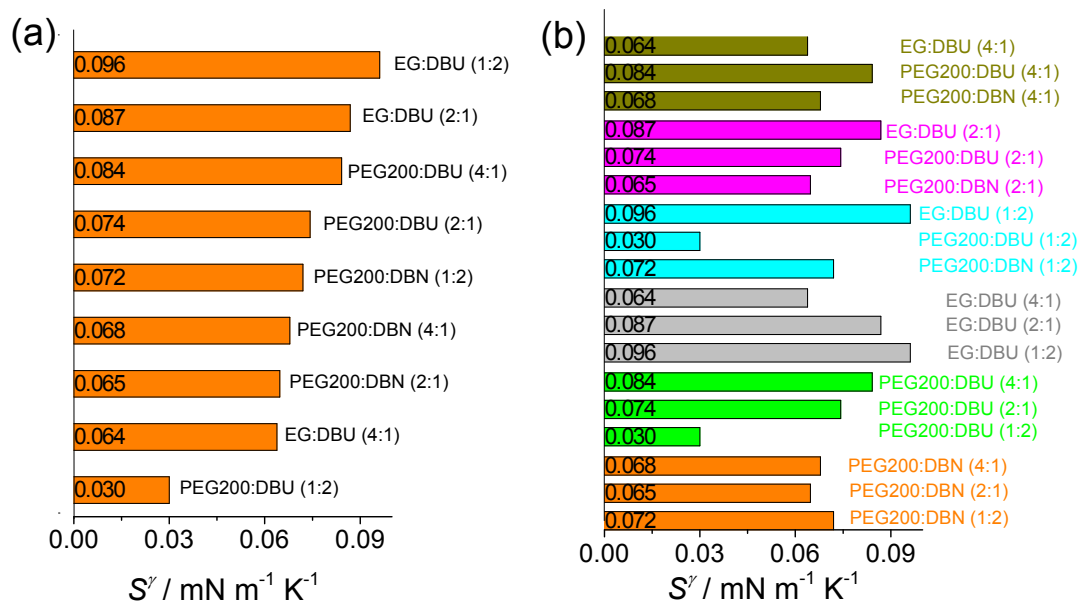

Figure S1. Entropy of surface formation ( $S^\gamma$ ) of superbase-derived ESs in the order from the highest at the top to the lowest at the bottom (a) and the effect of mol ratio/components (b).

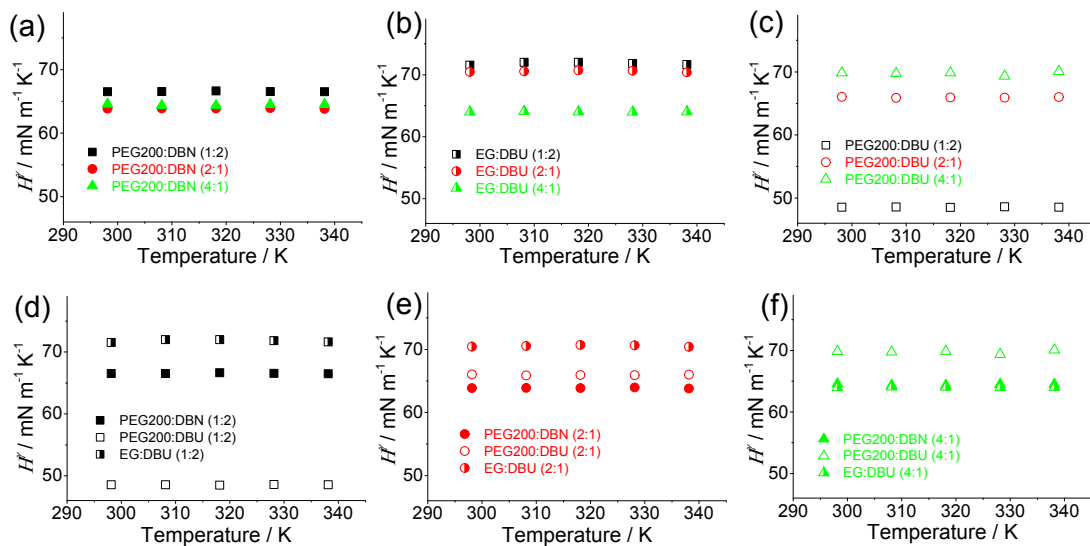

Figure S2. Effect of temperature on enthalpy of surface formation ( $H^\gamma$ ) of superbase-derived ESs. PEG200:DBN (a), EG:DBU (b), PEG200:DBU (c) varying in mole ratio, 1:2 (d), 2:1 (e) and 4:1 mole ratio (f) varying in components.

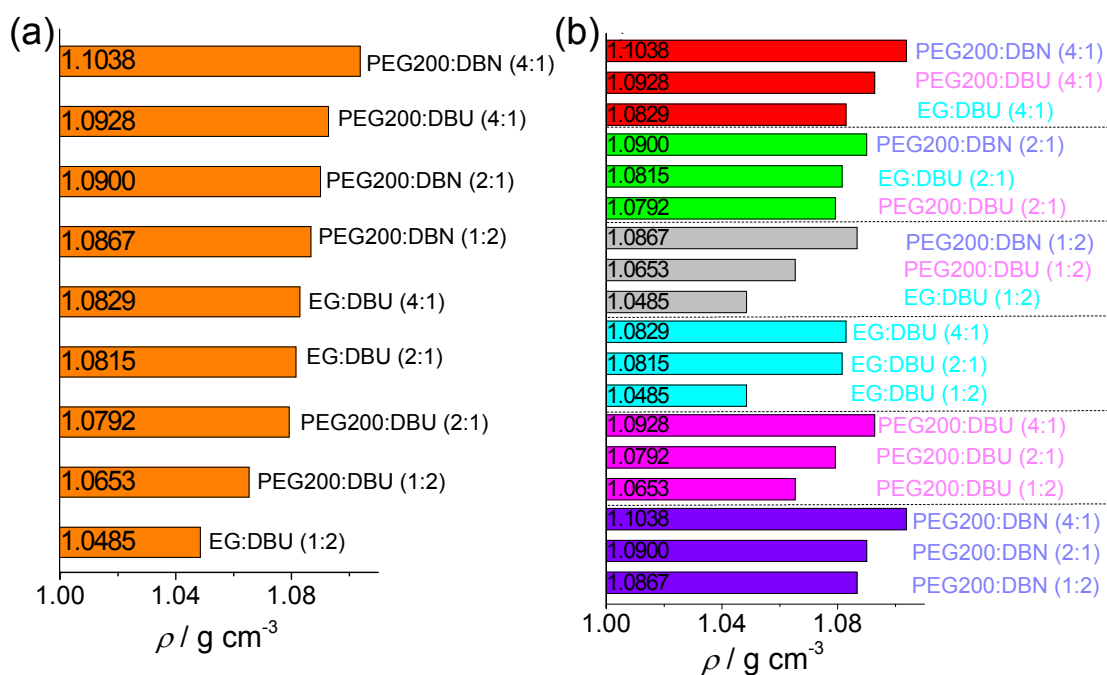

Figure S3. Density of superbase-derived ESs at 25 °C in the order from the highest at the top to the lowest at the bottom (a) and the effect of mol ratio/components (b).

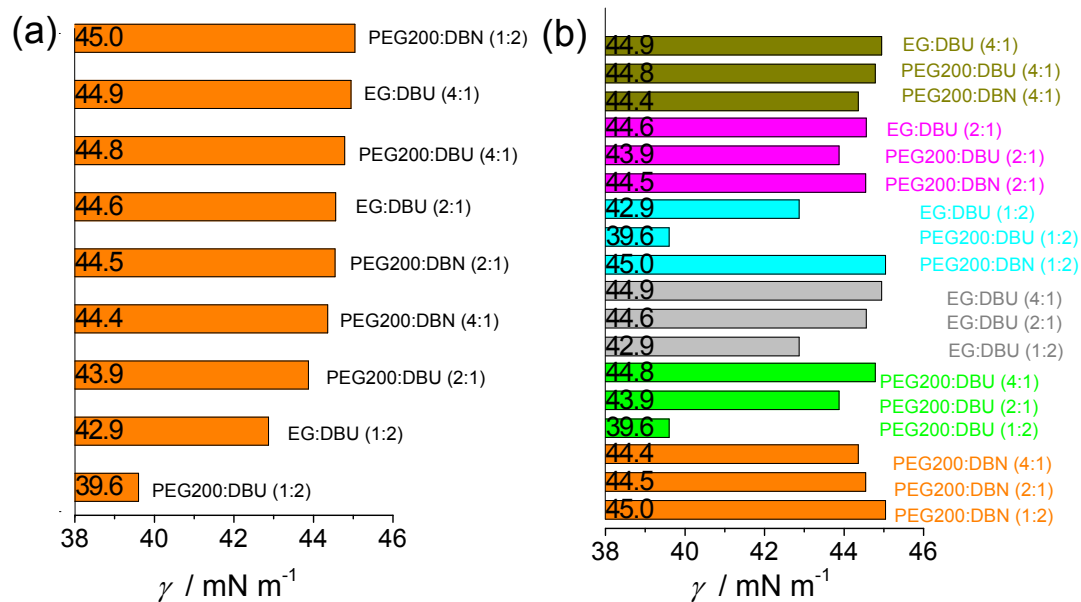

Figure S4. Surface tension of superbase-derived ESs at 25 °C in the order from the highest at the top to the lowest at the bottom (a) and the effect of mol ratio/components (b).

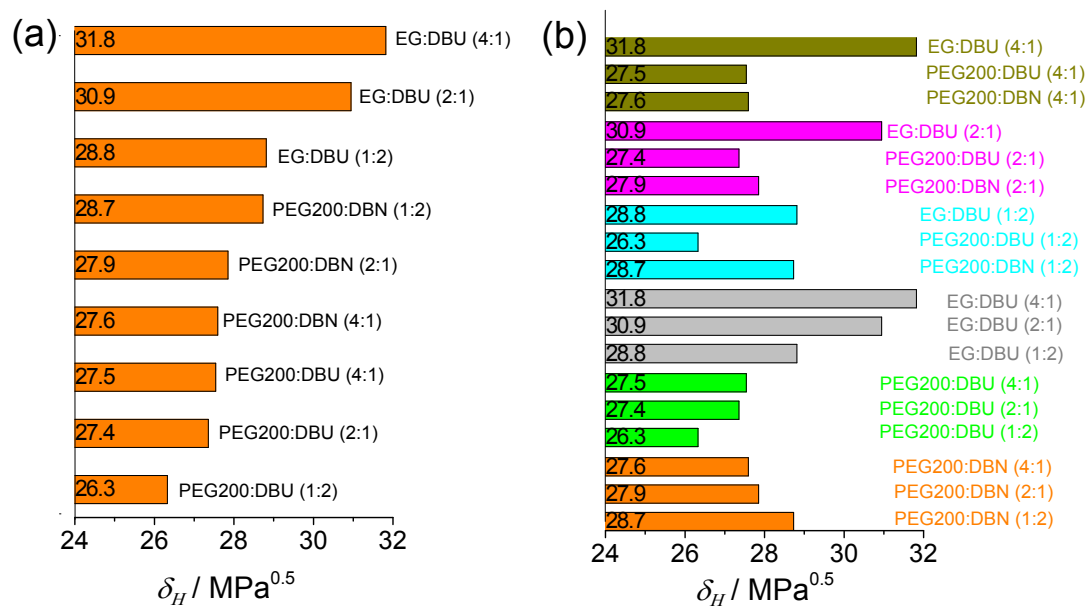

**Figure S5. Solubility parameter of superbase-derived ESs at 25 °C in the order from the highest at the top to the lowest at the bottom (a) and the effect of mol ratio/components (b).**

**Table S1. Comparison of empirical constant (K) and critical temperature (T<sub>c</sub>) for superbase-derived ESs varying in mole ratio and components.**

| Superbase-derived ESs | K / J K <sup>-1</sup> | T <sub>c</sub> / K |
|-----------------------|-----------------------|--------------------|
| PEG200:DBN (1:2)      | 2.8E-07               | 774                |
| PEG200:DBN (2:1)      | 2.7E-07               | 836                |
| PEG200:DBN (4:1)      | 3.0E-07               | 802                |
| PEG200:DBU (1:2)      | 1.5E-07               | 1119               |
| PEG200:DBU (2:1)      | 3.2E-07               | 766                |
| PEG200:DBU (4:1)      | 3.6E-07               | 729                |
| EG:DBU (1:2)          | 2.9E-07               | 677                |
| EG:DBU (2:1)          | 2.3E-07               | 715                |
| EG:DBU (4:1)          | 1.6E-07               | 835                |
| PEG200:DBN (1:2)      | 2.8E-07               | 774                |
| PEG200:DBU (1:2)      | 1.5E-07               | 1119               |
| EG:DBU (1:2)          | 2.9E-07               | 677                |
| PEG200:DBN (2:1)      | 2.7E-07               | 836                |
| PEG200:DBU (2:1)      | 3.2E-07               | 766                |
| EG:DBU (2:1)          | 2.3E-07               | 715                |
| PEG200:DBN (4:1)      | 3.0E-07               | 802                |
| PEG200:DBU (4:1)      | 3.6E-07               | 729                |
| EG:DBU (4:1)          | 1.6E-07               | 835                |

**Table S2. Comparison of vaporization enthalpy and vapor pressure of representative superbase-derived ESs, ionic liquids and common organic solvents investigated at ca. 298.15 K.**

| Categories       | Name                                                                                                 | $\Delta^{\circ}H_m^0$<br>/kJ mol <sup>-1</sup> | Reference     | Name                                                               | Vapor pressure<br>/ Pa | Reference     |
|------------------|------------------------------------------------------------------------------------------------------|------------------------------------------------|---------------|--------------------------------------------------------------------|------------------------|---------------|
| ESs              | PEG200:DBU (4:1)                                                                                     | 134.7                                          | this work     | PEG200:DBU (4:1)                                                   | —                      | this work     |
| ESs              | PEG200:DBU (2:1)                                                                                     | 130.1                                          | this work     | PEG200:DBU (2:1)                                                   | —                      | this work     |
| ESs              | PEG200:DBN (4:1)                                                                                     | 130.0                                          | this work     | PEG200:DBN (4:1)                                                   | —                      | this work     |
| ESs              | PEG200:DBN (2:1)                                                                                     | 126.8                                          | this work     | PEG200:DBN (2:1)                                                   | —                      | this work     |
| ESs              | PEG200:DBN (1:2)                                                                                     | 116.0                                          | this work     | PEG200:DBN (1:2)                                                   | —                      | this work     |
| ESs              | PEG200:DBU (1:2)                                                                                     | 111.9                                          | this work     | PEG200:DBU (1:2)                                                   | —                      | this work     |
| ESs              | EG:DBU (1:2)                                                                                         | 99.2                                           | this work     | EG:DBU (1:2)                                                       | —                      | this work     |
| ESs              | EG:DBU (2:1)                                                                                         | 84.1                                           | this work     | EG:DBU (2:1)                                                       | —                      | this work     |
| ESs              | EG:DBU (4:1)                                                                                         | 77.4                                           | this work     | EG:DBU (4:1)                                                       | 154.5                  | this work     |
| organic solvents | n-hexadecane                                                                                         | 81.4                                           | <sup>1</sup>  | propylene carbonate                                                | 8.5                    | <sup>2</sup>  |
| organic solvents | n-dodecane                                                                                           | 61.3                                           | <sup>1</sup>  | 1-methylbenzimidazole                                              | ca. 0.20               | <sup>3</sup>  |
| organic solvents | dimethylsulfoxide                                                                                    | 52.9                                           | <sup>4</sup>  | 1-methylbenzimidazole                                              | ca. 1.15               | <sup>3</sup>  |
| organic solvents | dimethylformamide                                                                                    | 49.2                                           | <sup>5</sup>  | 1-ethylbenzimidazole                                               | ca. 2.73               | <sup>3</sup>  |
| organic solvents | water                                                                                                | 43.98                                          | <sup>6</sup>  | 1-propylbenzimidazole                                              | ca. 1.66               | <sup>3</sup>  |
| organic solvents | ethanol                                                                                              | 42.32                                          | <sup>6</sup>  | 1-butylbenzimidazole                                               | ca. 0.78               | <sup>3</sup>  |
| organic solvents | methanol                                                                                             | 37.43                                          | <sup>6</sup>  | 1-pentylbenzimidazole                                              | ca. 0.28               | <sup>3</sup>  |
| organic solvents | benzene                                                                                              | 33.9                                           | <sup>1</sup>  | acetonitrile                                                       | 11839                  | <sup>7</sup>  |
| organic solvents | acetone                                                                                              | 30.90                                          | <sup>1</sup>  | triethylamine                                                      | 7599                   | <sup>7</sup>  |
| organic solvents | n-hexane                                                                                             | 31.5                                           | <sup>1</sup>  | N-methylpyrrolidone                                                | 44                     | <sup>7</sup>  |
| organic solvents | n-pentane                                                                                            | 26.7                                           | <sup>1</sup>  | dimethylsulfoxide                                                  | 80                     | <sup>7</sup>  |
| ionic liquids    | [C <sub>1</sub> C <sub>1</sub> IM][Glu]                                                              | 238.8                                          | <sup>8</sup>  | [C <sub>2</sub> C <sub>1</sub> IM][NTf <sub>2</sub> ] <sup>a</sup> | 1.05E-9                | <sup>9</sup>  |
| ionic liquids    | [C <sub>6</sub> C <sub>1</sub> IM][Glu]                                                              | 189.8                                          | <sup>8</sup>  | [C <sub>6</sub> C <sub>1</sub> IM][NTf <sub>2</sub> ] <sup>a</sup> | 8.37E-10               | <sup>9</sup>  |
| ionic liquids    | [H <sub>2</sub> N-C <sub>2</sub> C <sub>1</sub> IM][PF <sub>6</sub> ]                                | 165.6                                          | <sup>10</sup> | [C <sub>6</sub> C <sub>1</sub> IM][NTf <sub>2</sub> ] <sup>a</sup> | 4.67E-10               | <sup>9</sup>  |
| ionic liquids    | [H <sub>2</sub> N-C <sub>6</sub> C <sub>1</sub> IM][PF <sub>6</sub> ]                                | 156.4                                          | <sup>10</sup> | [C <sub>8</sub> C <sub>1</sub> IM][NTf <sub>2</sub> ] <sup>a</sup> | 7.98E-11               | <sup>9</sup>  |
| ionic liquids    | [C <sub>1</sub> C <sub>1</sub> IM][DMP]                                                              | 147.02                                         | <sup>6</sup>  | [C <sub>4</sub> C <sub>1</sub> IM][NTf <sub>2</sub> ] <sup>a</sup> | 2.72                   | <sup>11</sup> |
| ionic liquids    | [C <sub>4</sub> C <sub>2</sub> IM][DEP]                                                              | 133.72                                         | <sup>6</sup>  | ethyl ammonium nitrate                                             | < 0.5                  | <sup>2</sup>  |
| ionic liquids    | [C <sub>2</sub> C <sub>1</sub> IM][PF <sub>3</sub> (CF <sub>2</sub> CF <sub>3</sub> ) <sub>3</sub> ] | 157.8                                          | <sup>12</sup> | [C <sub>6</sub> C <sub>1</sub> IM][Thr]                            | 4.05E-6                | <sup>13</sup> |
| ionic liquids    | [C <sub>6</sub> C <sub>1</sub> IM][PF <sub>3</sub> (CF <sub>2</sub> CF <sub>3</sub> ) <sub>3</sub> ] | 163.1                                          | <sup>12</sup> | [C <sub>3</sub> C <sub>1</sub> IM][Ac] <sup>a</sup>                | 1.73E-4                | <sup>14</sup> |
| ionic liquids    | [tmgH][L]                                                                                            | 108.0                                          | <sup>15</sup> |                                                                    |                        |               |
| ionic liquids    | [C <sub>4</sub> C <sub>1</sub> IM][NTf <sub>2</sub> ]                                                | 134.6                                          | <sup>16</sup> |                                                                    |                        |               |
| ionic liquids    | [C <sub>8</sub> C <sub>1</sub> IM][NTf <sub>2</sub> ]                                                | 149.0                                          | <sup>16</sup> |                                                                    |                        |               |
| ionic liquids    | [C <sub>2</sub> C <sub>1</sub> IM][B(CN) <sub>4</sub> ]                                              | 130.9                                          | <sup>17</sup> |                                                                    |                        |               |
| ionic liquids    | [C <sub>2</sub> C <sub>1</sub> IM][CF <sub>3</sub> SO <sub>3</sub> ]                                 | 132.8                                          | <sup>17</sup> |                                                                    |                        |               |
| ionic liquids    | [C <sub>1</sub> C <sub>1</sub> IM][DMPO <sub>4</sub> ]                                               | 111.3                                          | <sup>18</sup> |                                                                    |                        |               |
| ionic liquids    | [C <sub>2</sub> C <sub>1</sub> IM][C <sub>8</sub> SO <sub>4</sub> ]                                  | 172.0                                          | <sup>19</sup> |                                                                    |                        |               |
| ionic liquids    | [C <sub>2</sub> C <sub>1</sub> IM][FAP]                                                              | 125.8                                          | <sup>19</sup> |                                                                    |                        |               |
| ionic liquids    | [DBUH][nPrCOO]                                                                                       | 190.5                                          | <sup>20</sup> |                                                                    |                        |               |
| ionic liquids    | [C <sub>2</sub> Py][Ntf <sub>2</sub> ]                                                               | 131.4                                          | <sup>21</sup> |                                                                    |                        |               |
| ionic liquids    | [C <sub>8</sub> C <sub>8</sub> IM][Br]                                                               | 181.4                                          | <sup>22</sup> |                                                                    |                        |               |

<sup>a</sup> vapor pressure of these ionic liquids is derived from mathematical fitted Antoine model.



**Table S3. Evaporation rate  $dm/dt$ , molecular weight  $M$ ,  $\nu$  and vapor pressure  $p$  of EG at different temperature  $T$ .**

| $T$  | $T$    | $dm/dt$               | $M$                   | $\nu$                                                                       | $p$    |
|------|--------|-----------------------|-----------------------|-----------------------------------------------------------------------------|--------|
| / °C | / K    | / g min <sup>-1</sup> | / g mol <sup>-1</sup> | / g <sup>0.5</sup> min <sup>-1</sup> mol <sup>0.5</sup><br>K <sup>0.5</sup> | / Pa   |
| 45   | 343.15 | -9.48E-05             | 62.068                | -2.2E-04                                                                    | 370.9  |
| 55   | 353.15 | -1.70E-04             | 62.068                | -4.1E-04                                                                    | 698.7  |
| 65   | 363.15 | -2.24E-04             | 62.068                | -5.4E-04                                                                    | 1265.7 |
| 75   | 373.15 | -3.62E-04             | 62.068                | -8.9E-04                                                                    | 2212.5 |
| 85   | 383.15 | -5.75E-04             | 62.068                | -0.0014                                                                     | 3743.7 |
| 95   | 393.15 | -8.85E-04             | 62.068                | -0.0022                                                                     | 6148.6 |

These data are extracted from the reference.<sup>23</sup>

**Table S4. Mass loss of EG:DBU (4:1) at 1 h as the short-term volatility and at 20 h as the long-term volatility as a function of temperature.**

| $T$  | $T$    | Mass loss at 1 h | Mass loss at 20 h |
|------|--------|------------------|-------------------|
| / °C | / K    | / %              | / %               |
| 25   | 298.15 | 5.0              | 43.5              |
| 35   | 308.15 | 7.8              | 64.3              |
| 45   | 318.15 | 20.7             | 94.6              |
| 55   | 328.15 | 42.7             | 98.5              |
| 65   | 338.15 | 64.4             | 98.8              |

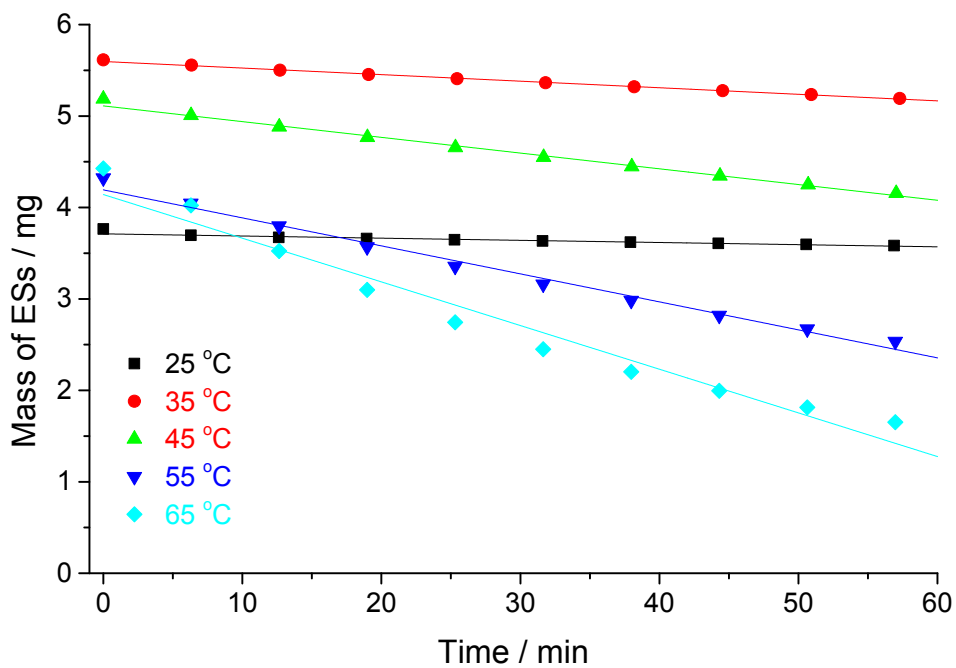

**Figure S6. Mass of EG:DBU (4:1) as a function of time at 25 °C to 65 °C in the interval of 10 °C by TGA in the first 60 min (isothermal mode, nitrogen gas, platinum pan, skipped 100 points). These lines are the linear fitted lines for the purpose of obtaining  $dm/dt$ .**

**Table S5. Evaporation rate  $dm/dt$  of EG:DBU (4:1) as a function of temperature and the corresponding linearly fitted equation.**

| $T$<br>/ °C | $T$<br>/ K | Linearly fitted equation   | $R^2$  | $dm/dt$<br>/ g min <sup>-1</sup> |
|-------------|------------|----------------------------|--------|----------------------------------|
| 25          | 298.15     | $m = -0.00237 t + 3.71171$ | 0.9515 | -0.00237                         |
| 35          | 308.15     | $m = -0.00718 t + 5.59660$ | 0.9978 | -0.00718                         |
| 45          | 318.15     | $m = -0.01720 t + 5.11105$ | 0.9947 | -0.01720                         |
| 55          | 328.15     | $m = -0.03062 t + 4.19248$ | 0.9877 | -0.03062                         |
| 65          | 338.15     | $m = -0.04776 t + 4.14163$ | 0.962  | -0.04776                         |

**Table S6. Vapor pressure of EG:DBU (4:1) as a function of temperature.<sup>a</sup>**

| $T$<br>/ °C | $T$<br>/ K | M<br>/ g mol <sup>-1</sup> | $k$<br>/ Pa min g <sup>-0.5</sup><br>mol <sup>-0.5</sup> K <sup>0.5</sup> | $dm/dt$<br>/ g min <sup>-1</sup> | $p$<br>/ Pa |
|-------------|------------|----------------------------|---------------------------------------------------------------------------|----------------------------------|-------------|
| 25          | 298.15     | 80.104                     | -2.66E6                                                                   | -0.00237                         | 154.5       |
| 35          | 308.15     | 80.104                     | -2.66E6                                                                   | -0.00718                         | 157.1       |
| 45          | 318.15     | 80.104                     | -2.66E6                                                                   | -0.01720                         | 159.6       |
| 55          | 328.15     | 80.104                     | -2.66E6                                                                   | -0.03062                         | 162.1       |
| 65          | 338.15     | 80.104                     | -2.66E6                                                                   | -0.04776                         | 164.6       |

<sup>a</sup> molecular weight of EG:DBU(4:1) is derived by averaging the molecular weight of EG and DBU with the mol ratio of 4:1.

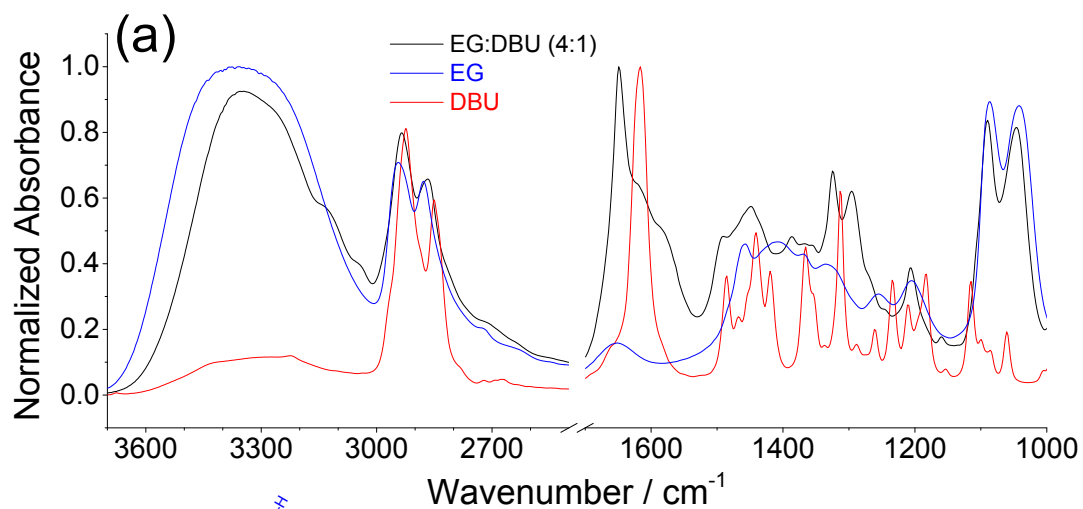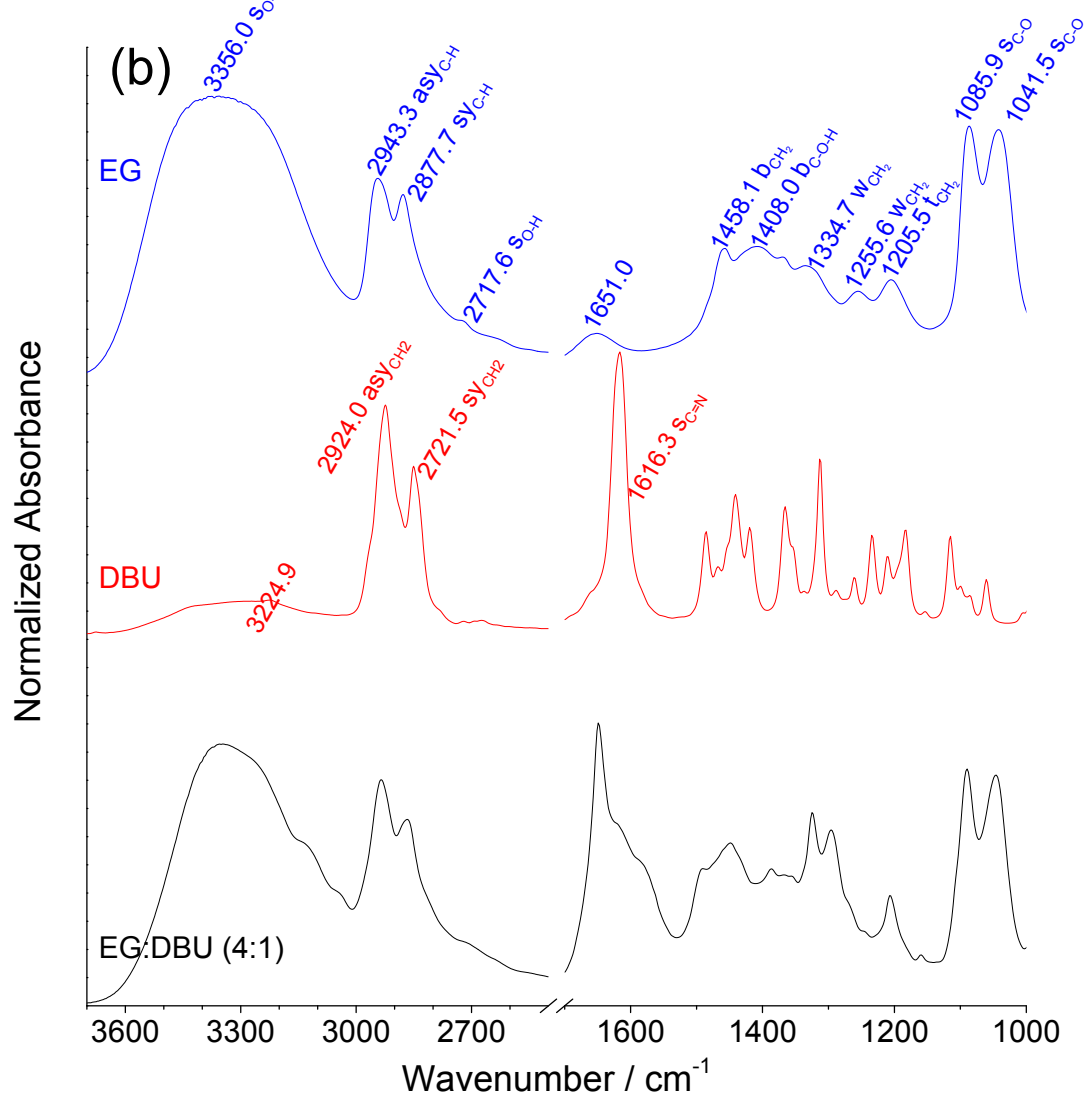

Figure S7. IR spectra of EG, DBU and EG:DBU (4:1) with converged comparison (a) and separately assignment (b).

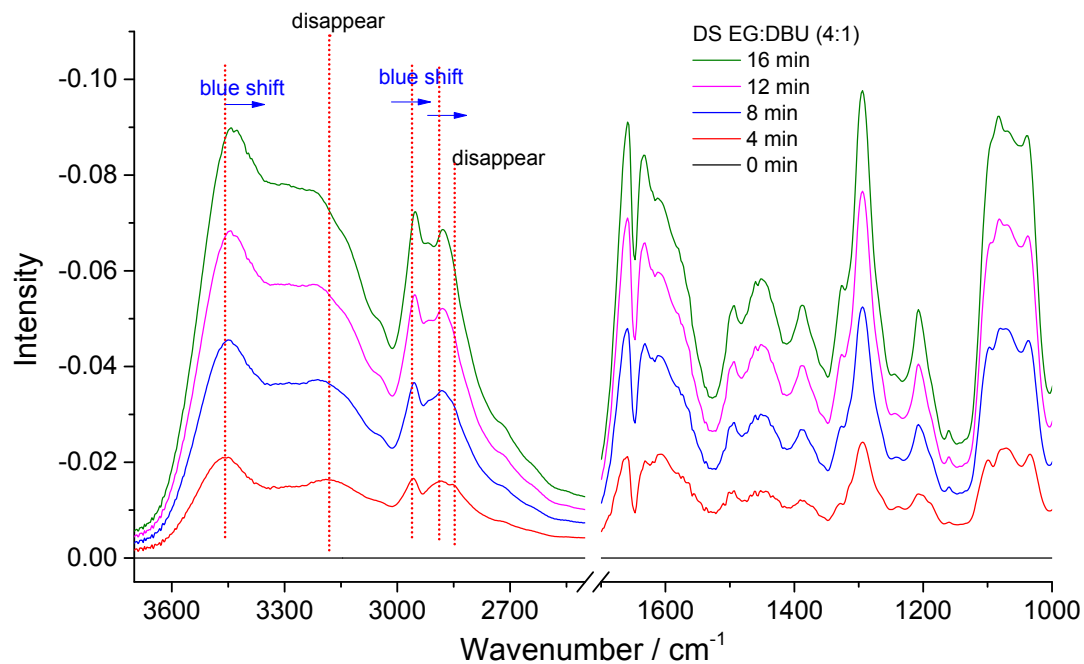

**Figure S8. IR difference spectra (DS) of EG:DBU (4:1) in the first 16 min.**

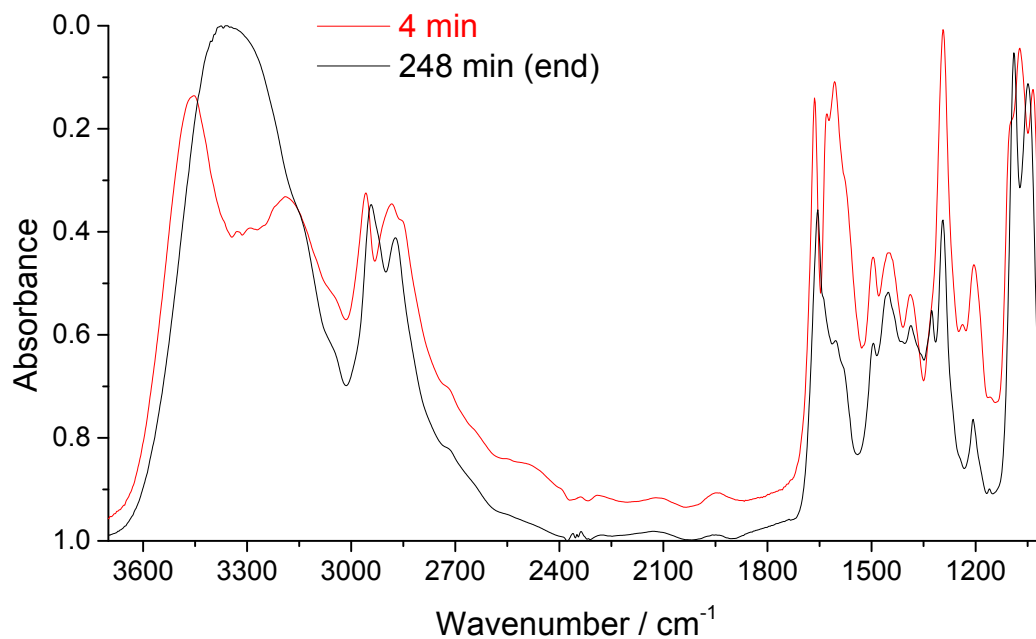

**Figure S9. Normalized IR difference spectra (DS) of EG:DBU (4:1) at 4 min and at the end (248 min).**

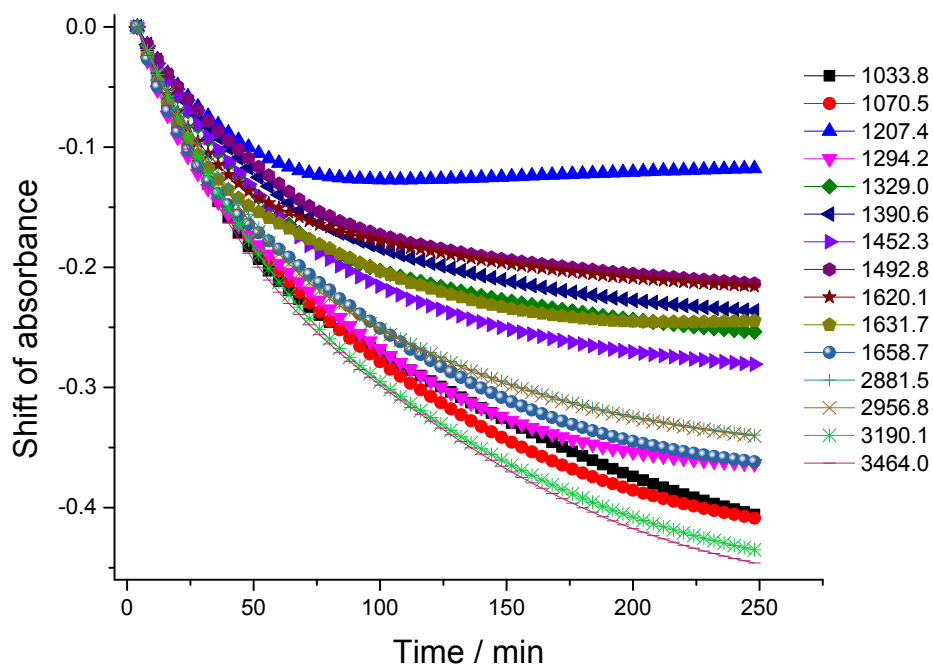

Figure S10. Shift of IR peak in difference spectra (DS) of EG:DBU (4:1) as a function of time.

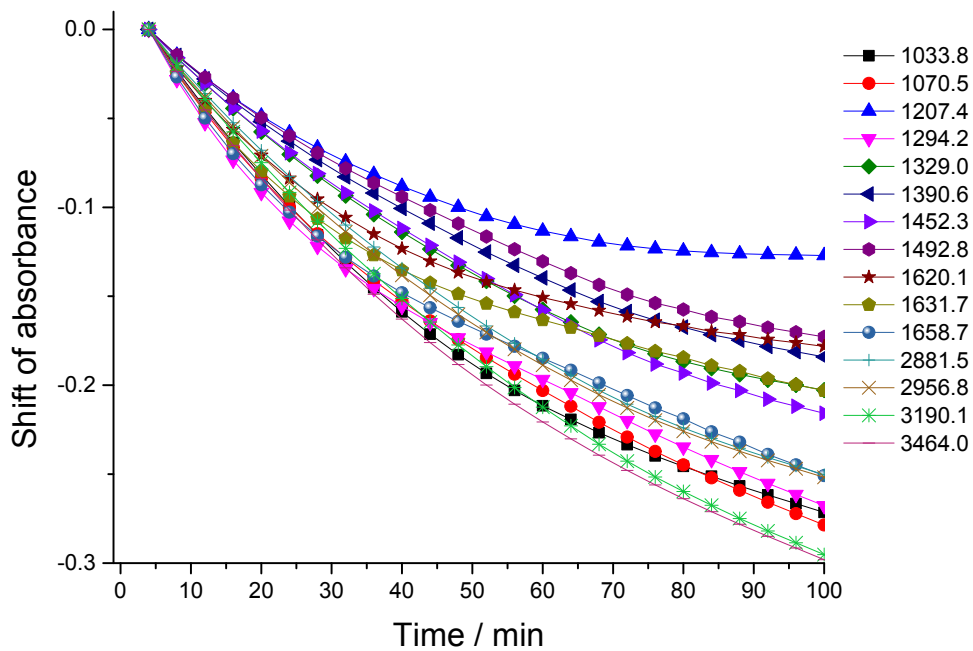

Figure S11. Expanded shift of IR peak in difference spectra (DS) of EG:DBU (4:1) as a function of time during the first 100 min.

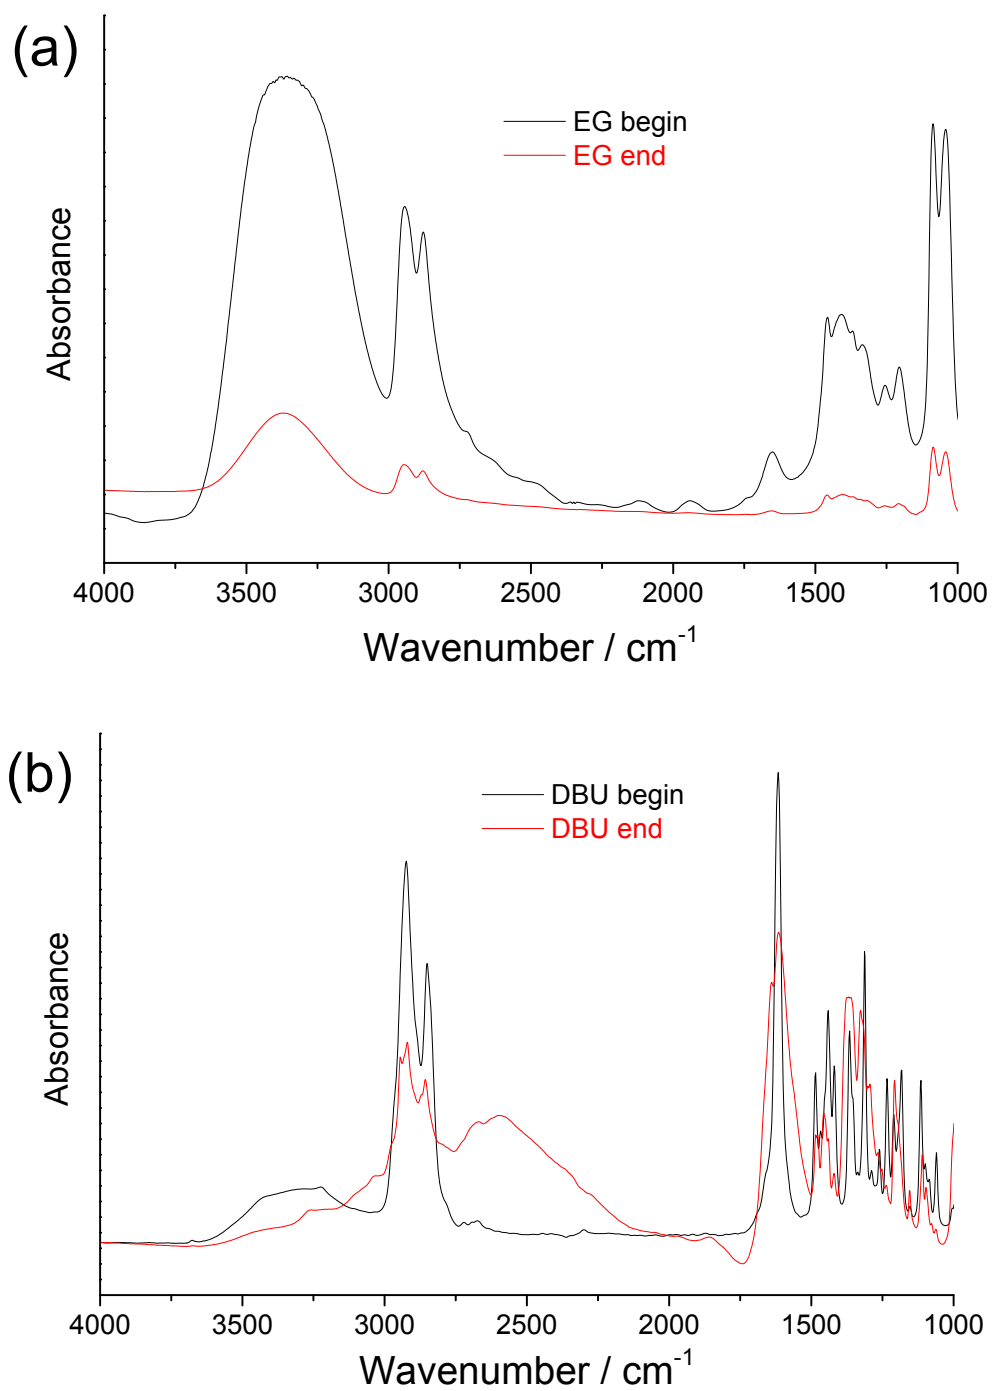

Figure S12. IR spectra of EG (a) and DBU (b) exposed to the air at the beginning at 0 min and at the end at 248 min.

**Table S7. IR peaks of EG:DBU (4:1), EG:DBU (4:1)+CO<sub>2</sub> at the beginning and at the end.<sup>a</sup>**

| EG:DBU (4:1)<br>at the<br>beginning<br>/ cm <sup>-1</sup> | EG:DBU<br>(4:1)+CO <sub>2</sub> at<br>the beginning<br>/ cm <sup>-1</sup> | Shift after<br>CO <sub>2</sub><br>capture<br>/ cm <sup>-1</sup> | Shift after<br>CO <sub>2</sub><br>capture | EG:DBU<br>(4:1)<br>at the end<br>/ cm <sup>-1</sup> | EG:DBU<br>(4:1)+CO <sub>2</sub><br>at the end<br>/ cm <sup>-1</sup> | Shift after<br>CO <sub>2</sub><br>capture<br>/ cm <sup>-1</sup> | Shift after<br>CO <sub>2</sub><br>capture |
|-----------------------------------------------------------|---------------------------------------------------------------------------|-----------------------------------------------------------------|-------------------------------------------|-----------------------------------------------------|---------------------------------------------------------------------|-----------------------------------------------------------------|-------------------------------------------|
| 1045.4                                                    | 1043.5                                                                    | -1.9                                                            | →                                         | 1043.5                                              | 1045.4                                                              | 1.9                                                             | ←                                         |
| 1089.7                                                    | 1087.8                                                                    | -1.9                                                            | →                                         | 1089.7                                              | 1089.7                                                              | 0                                                               |                                           |
| 1159.2                                                    | 1159.2                                                                    | 0                                                               |                                           | 1159.2                                              | 1159.2                                                              | 0                                                               |                                           |
| 1207.4                                                    | 1201.6                                                                    | -5.8                                                            | →                                         | 1205.5                                              | 1201.6                                                              | -3.9                                                            | →                                         |
| —                                                         | 1263.3                                                                    | ♥                                                               | ♥                                         | 1269.1                                              | 1263.3                                                              | -5.8                                                            | →                                         |
| 1296.1                                                    | —                                                                         | ♥                                                               | ♥                                         | —                                                   | —                                                                   | --                                                              |                                           |
| 1325.0                                                    | 1325.0                                                                    | 0                                                               |                                           | 1323.1                                              | 1323.1                                                              | 0                                                               |                                           |
| 1335.9                                                    | 1354.0                                                                    | 18.1                                                            | ←                                         | 1354.0                                              | 1354.0                                                              | 0                                                               |                                           |
| 1367.5                                                    | 1365.6                                                                    | -1.9                                                            | →                                         | —                                                   | —                                                                   | --                                                              |                                           |
| 1386.8                                                    | 1388.7                                                                    | 1.9                                                             | ←                                         | 1386.8                                              | 1388.7                                                              | 1.9                                                             | ←                                         |
| 1448.5                                                    | 1448.5                                                                    | 0                                                               |                                           | 1446.6                                              | 1446.6                                                              | 0                                                               |                                           |
| 1490.9                                                    | 1494.8                                                                    | 3.9                                                             | ←                                         | —                                                   | —                                                                   | --                                                              |                                           |
| 1649.1                                                    | 1649.1                                                                    | 0                                                               |                                           | 1647.1                                              | 1643.3                                                              | -3.8                                                            | →                                         |
| 2868.0                                                    | 2870.0                                                                    | 2                                                               | ←                                         | 2862.3                                              | 2860.3                                                              | -2                                                              | →                                         |
| 2935.6                                                    | 2935.6                                                                    | 0                                                               |                                           | 2931.7                                              | 2931.7                                                              | 0                                                               |                                           |
| 3346.4                                                    | 3356.0                                                                    | 9.6                                                             | ←                                         | 3344.4                                              | 3356.0                                                              | 11.6                                                            | ←                                         |

<sup>a</sup> ← means blue shift of IR peak; → means red shift of IR peak; ♥ means new peak or disappeared peak with significant change of IR peak; Blank cell means no shift; — means that there is no IR peak.



**Table S8. Calculated IR spectra of EG, EG/EG (1:1), DBU and EG:DBU (1:1) by DFT B3LYP/6-31++G(d, p) method.<sup>24</sup>**

| Freq. of<br>EG | Inten. of<br>EG | Freq. of<br>EG/EG<br>(1:1) | Inten. of<br>EG/EG<br>(1:1) | Freq. of<br>DBU | Inten. of<br>DBU | Freq. of<br>EG:DB<br>U<br>(1:1) | Inten. of<br>EG:DBU<br>(1:1) | Freq. of<br>EG:DBU<br>(2:1) | Inten. of<br>EG:DBU<br>(2:1) |
|----------------|-----------------|----------------------------|-----------------------------|-----------------|------------------|---------------------------------|------------------------------|-----------------------------|------------------------------|
| 1063.0         | 237.55          | 1057.9                     | 572.99                      | 1010.5          | 4.45             | 1004.9                          | 6.22                         | 1005.1                      | 6.06                         |
| 1076.8         | 0.01            | 1069.0                     | 0.01                        | 1014.0          | 2.45             | 1013.1                          | 8.88                         | 1014.0                      | 4.55                         |
| 1157.2         | 0.03            | 1076.7                     | 1.69                        | 1069.5          | 14.44            | 1018.7                          | 0.79                         | 1019.2                      | 1.35                         |
| 1176.0         | 92.04           | 1081.8                     | 0.00                        | 1097.8          | 2.40             | 1058.8                          | 146.78                       | 1060.2                      | 168.06                       |
| 1224.2         | 1.27            | 1157.3                     | 572.99                      | 1100.7          | 2.69             | 1075.9                          | 21.95                        | 1063.7                      | 216.00                       |
| 1274.0         | 0.00            | 1158.0                     | 0.01                        | 1121.9          | 6.94             | 1096.0                          | 65.10                        | 1075.6                      | 21.80                        |
| 1301.4         | 0.00            | 1181.3                     | 234.22                      | 1133.9          | 21.34            | 1100.4                          | 8.64                         | 1078.3                      | 9.39                         |
| 1397.3         | 4.84            | 1199.3                     | 0.00                        | 1188.8          | 2.04             | 1103.5                          | 5.06                         | 1094.8                      | 72.66                        |
| 1476.0         | 0.00            | 1225.0                     | 2.95                        | 1206.4          | 22.99            | 1123.4                          | 7.81                         | 1100.8                      | 6.46                         |
| 1525.6         | 0.00            | 1225.2                     | 0.98                        | 1217.3          | 5.79             | 1132.9                          | 21.63                        | 1102.1                      | 3.21                         |
| 1534.1         | 6.83            | 1272.5                     | 6.43                        | 1229.9          | 17.44            | 1158.6                          | 0.06                         | 1120.8                      | 10.41                        |
| 3009.4         | 0.00            | 1296.7                     | 0.00                        | 1249.7          | 11.56            | 1191.1                          | 1.95                         | 1126.7                      | 19.49                        |
| 3014.8         | 113.60          | 1301.9                     | 0.20                        | 1258.2          | 27.81            | 1209.9                          | 19.02                        | 1157.2                      | 1.56                         |
| 3040.2         | 0.00            | 1302.1                     | 0.00                        | 1291.0          | 3.27             | 1216.5                          | 48.60                        | 1158.2                      | 0.01                         |
| 3067.1         | 92.35           | 1399.9                     | 0.00                        | 1296.5          | 4.41             | 1222.1                          | 14.76                        | 1190.5                      | 11.14                        |
| 3848.5         | 0.00            | 1401.2                     | 10.19                       | 1310.7          | 4.24             | 1226.2                          | 16.54                        | 1200.9                      | 63.89                        |
| 3849.0         | 71.11           | 1476.8                     | 0.00                        | 1340.9          | 8.51             | 1232.3                          | 17.29                        | 1215.3                      | 28.59                        |
|                |                 | 1478.3                     | 1.37                        | 1344.0          | 37.02            | 1255.8                          | 7.63                         | 1217.8                      | 76.13                        |
|                |                 | 1525.1                     | 0.05                        | 1363.1          | 5.45             | 1261.6                          | 25.70                        | 1219.8                      | 12.86                        |
|                |                 | 1525.5                     | 0.00                        | 1367.5          | 0.92             | 1293.6                          | 2.61                         | 1225.1                      | 12.90                        |
|                |                 | 1533.9                     | 14.58                       | 1380.0          | 0.09             | 1297.3                          | 0.17                         | 1226.1                      | 1.83                         |
|                |                 | 1534.1                     | 0.02                        | 1384.4          | 27.89            | 1301.2                          | 4.72                         | 1227.0                      | 10.81                        |
|                |                 | 3008.1                     | 49.88                       | 1396.0          | 35.92            | 1312.7                          | 4.29                         | 1252.0                      | 22.04                        |
|                |                 | 3008.2                     | 0.03                        | 1405.6          | 17.74            | 1341.4                          | 12.64                        | 1260.0                      | 4.02                         |
|                |                 | 3017.9                     | 175.85                      | 1450.4          | 40.36            | 1345.7                          | 51.02                        | 1292.2                      | 13.28                        |
|                |                 | 3018.3                     | 0.01                        | 1483.6          | 3.81             | 1351.6                          | 8.87                         | 1294.7                      | 7.15                         |
|                |                 | 3040.8                     | 8.16                        | 1489.4          | 0.56             | 1365.5                          | 3.23                         | 1298.1                      | 0.07                         |
|                |                 | 3040.9                     | 0.01                        | 1491.1          | 7.10             | 1370.8                          | 1.31                         | 1300.5                      | 4.93                         |
|                |                 | 3069.2                     | 0.01                        | 1496.4          | 3.46             | 1383.0                          | 0.67                         | 1302.7                      | 0.47                         |
|                |                 | 3069.5                     | 167.88                      | 1498.7          | 11.21            | 1387.1                          | 25.84                        | 1310.7                      | 3.34                         |
|                |                 | 3794.4                     | 0.03                        | 1505.8          | 12.39            | 1400.2                          | 37.64                        | 1339.0                      | 28.76                        |

|  |  |        |        |        |        |        |         |        |        |
|--|--|--------|--------|--------|--------|--------|---------|--------|--------|
|  |  | 3803.6 | 235.71 | 1522.7 | 7.71   | 1407.0 | 13.12   | 1345.0 | 35.92  |
|  |  | 3848.6 | 68.17  | 1529.5 | 8.58   | 1429.1 | 4.39    | 1353.7 | 8.99   |
|  |  | 3848.7 | 4.59   | 1682.4 | 301.26 | 1458.4 | 47.63   | 1365.8 | 4.23   |
|  |  |        |        | 2983.5 | 33.55  | 1487.1 | 3.02    | 1371.2 | 1.44   |
|  |  |        |        | 2991.5 | 95.77  | 1489.7 | 5.34    | 1386.2 | 1.43   |
|  |  |        |        | 3021.2 | 34.33  | 1493.0 | 1.92    | 1389.9 | 17.76  |
|  |  |        |        | 3028.7 | 31.94  | 1497.5 | 2.63    | 1399.8 | 25.57  |
|  |  |        |        | 3034.8 | 6.17   | 1502.9 | 12.45   | 1405.6 | 1.95   |
|  |  |        |        | 3037.1 | 24.96  | 1507.0 | 9.00    | 1411.3 | 11.51  |
|  |  |        |        | 3044.4 | 8.91   | 1509.5 | 8.19    | 1428.4 | 5.21   |
|  |  |        |        | 3047.9 | 56.08  | 1522.5 | 7.10    | 1451.6 | 37.01  |
|  |  |        |        | 3055.2 | 24.15  | 1523.6 | 3.15    | 1480.1 | 1.36   |
|  |  |        |        | 3060.7 | 77.07  | 1530.3 | 9.39    | 1488.9 | 0.79   |
|  |  |        |        | 3065.0 | 49.29  | 1533.7 | 11.06   | 1491.8 | 4.99   |
|  |  |        |        | 3070.7 | 33.72  | 1674.1 | 410.98  | 1495.4 | 2.90   |
|  |  |        |        | 3080.1 | 70.94  | 2976.7 | 55.56   | 1501.3 | 0.81   |
|  |  |        |        | 3087.3 | 47.25  | 2994.9 | 23.90   | 1504.7 | 11.98  |
|  |  |        |        | 3096.3 | 53.30  | 3001.7 | 87.52   | 1506.6 | 7.48   |
|  |  |        |        | 3131.8 | 11.26  | 3005.3 | 31.39   | 1512.1 | 13.62  |
|  |  |        |        |        |        | 3007.9 | 66.95   | 1523.3 | 0.98   |
|  |  |        |        |        |        | 3025.5 | 36.83   | 1525.0 | 11.97  |
|  |  |        |        |        |        | 3034.3 | 25.90   | 1525.5 | 0.08   |
|  |  |        |        |        |        | 3039.7 | 20.06   | 1532.2 | 6.74   |
|  |  |        |        |        |        | 3042.4 | 8.96    | 1533.4 | 12.05  |
|  |  |        |        |        |        | 3047.4 | 10.24   | 1534.5 | 8.94   |
|  |  |        |        |        |        | 3053.2 | 82.67   | 1679.3 | 334.59 |
|  |  |        |        |        |        | 3056.1 | 25.97   | 2980.3 | 56.13  |
|  |  |        |        |        |        | 3060.1 | 42.91   | 2933.8 | 37.86  |
|  |  |        |        |        |        | 3066.8 | 61.44   | 3005.8 | 1.55   |
|  |  |        |        |        |        | 3074.6 | 43.38   | 3007.9 | 52.25  |
|  |  |        |        |        |        | 3075.8 | 30.35   | 3009.4 | 36.92  |
|  |  |        |        |        |        | 3084.5 | 65.89   | 3010.7 | 98.92  |
|  |  |        |        |        |        | 3094.0 | 44.13   | 3023.4 | 35.83  |
|  |  |        |        |        |        | 3102.8 | 41.39   | 3029.1 | 37.28  |
|  |  |        |        |        |        | 3134.1 | 3.93    | 3037.1 | 24.96  |
|  |  |        |        |        |        | 3304.6 | 1704.05 | 3038.2 | 3.50   |
|  |  |        |        |        |        | 3847.3 | 29.27   | 3039.0 | 19.26  |
|  |  |        |        |        |        |        |         | 3046.9 | 10.19  |
|  |  |        |        |        |        |        |         | 3054.3 | 81.63  |
|  |  |        |        |        |        |        |         | 3055.3 | 10.46  |
|  |  |        |        |        |        |        |         | 3062.1 | 1.10   |

|  |  |  |  |  |  |  |  |        |         |
|--|--|--|--|--|--|--|--|--------|---------|
|  |  |  |  |  |  |  |  | 3064.5 | 84.52   |
|  |  |  |  |  |  |  |  | 3064.8 | 55.06   |
|  |  |  |  |  |  |  |  | 3075.4 | 42.61   |
|  |  |  |  |  |  |  |  | 3078.1 | 39.41   |
|  |  |  |  |  |  |  |  | 3084.4 | 37.88   |
|  |  |  |  |  |  |  |  | 3085.8 | 57.06   |
|  |  |  |  |  |  |  |  | 3097.8 | 36.36   |
|  |  |  |  |  |  |  |  | 3119.1 | 23.72   |
|  |  |  |  |  |  |  |  | 3136.9 | 2.25    |
|  |  |  |  |  |  |  |  | 3361.2 | 1622.50 |
|  |  |  |  |  |  |  |  | 3720.8 | 416.25  |
|  |  |  |  |  |  |  |  | 3847.7 | 40.08   |
|  |  |  |  |  |  |  |  | 3847.8 | 27.85   |

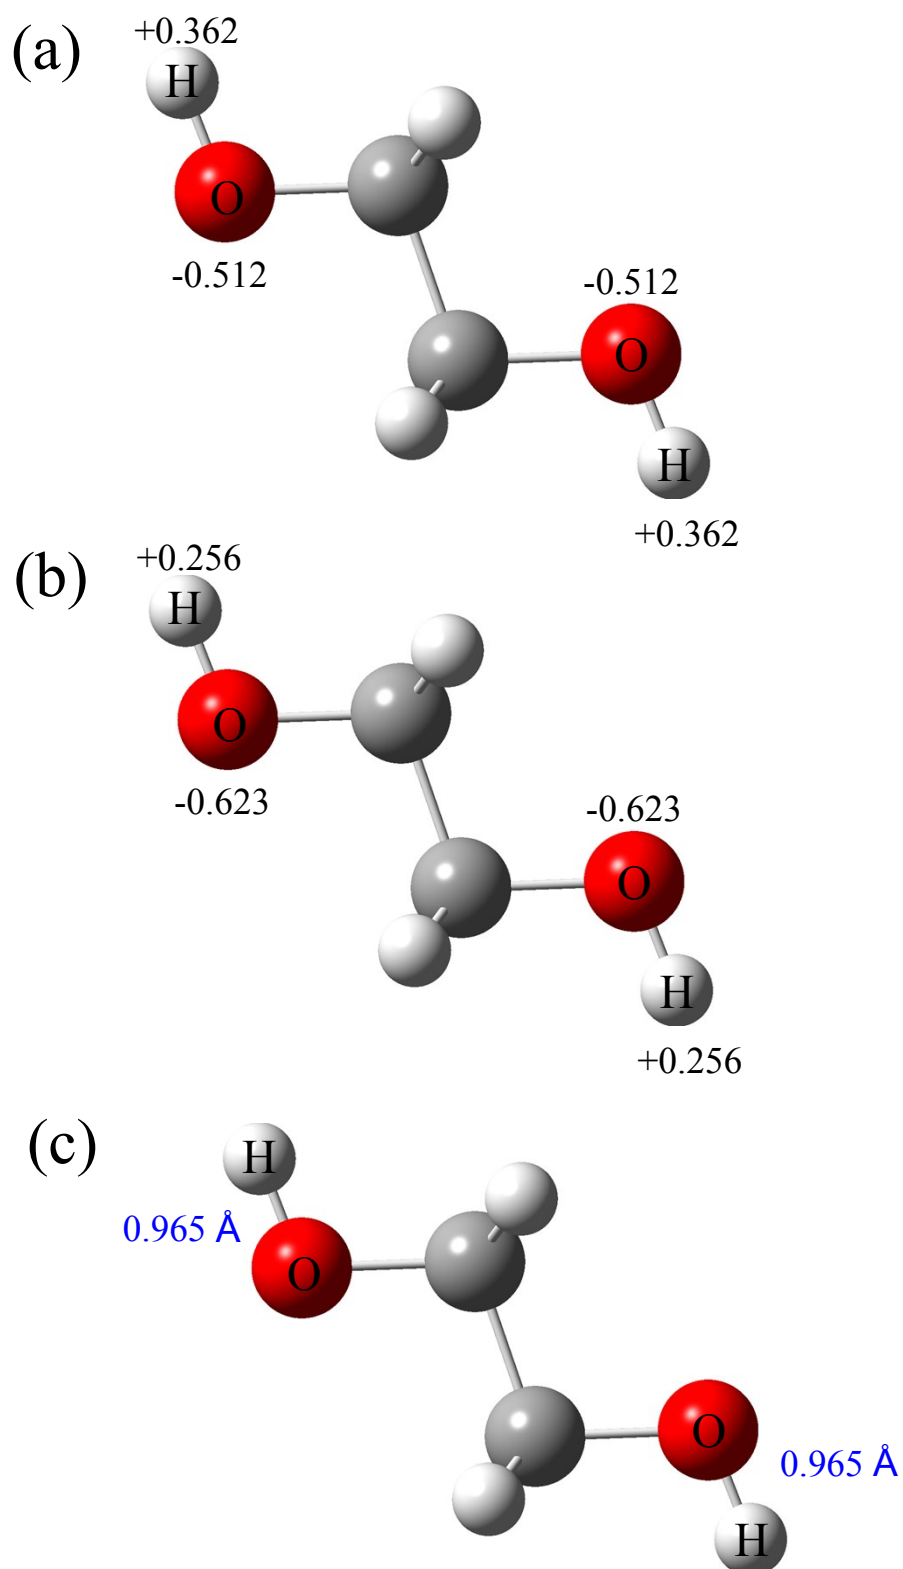

Figure S1. Calculated Mulliken charge (a), APT charge (b) and O-H bond length (c) of EG by DFT B3IYP/6-31++G(d, p) method. Black and blue numbers are charge and bond length, respectively.

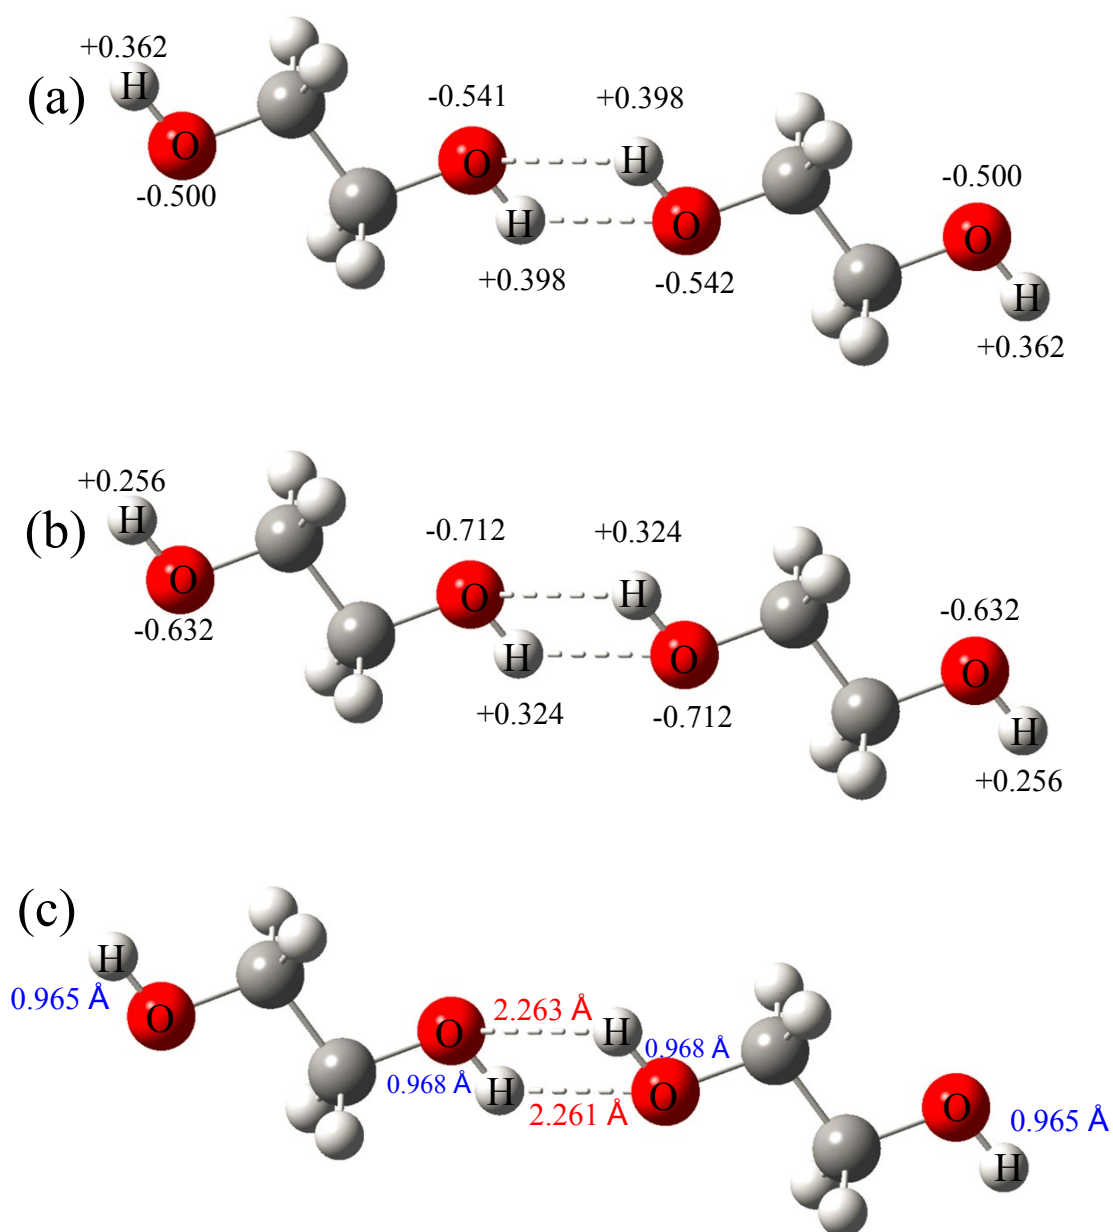

**Figure S2.** Calculated Mulliken charge (a) APT charge (b) and O-H bond length (c) of EG/EG (1:1) by DFT B3LYP/6-31++G(d, p) method. Black, blue and red numbers are charge, intramolecular bond length and intermolecular hydrogen-bond length, respectively. The intermolecular hydrogen-bond is also marked with dashed line.

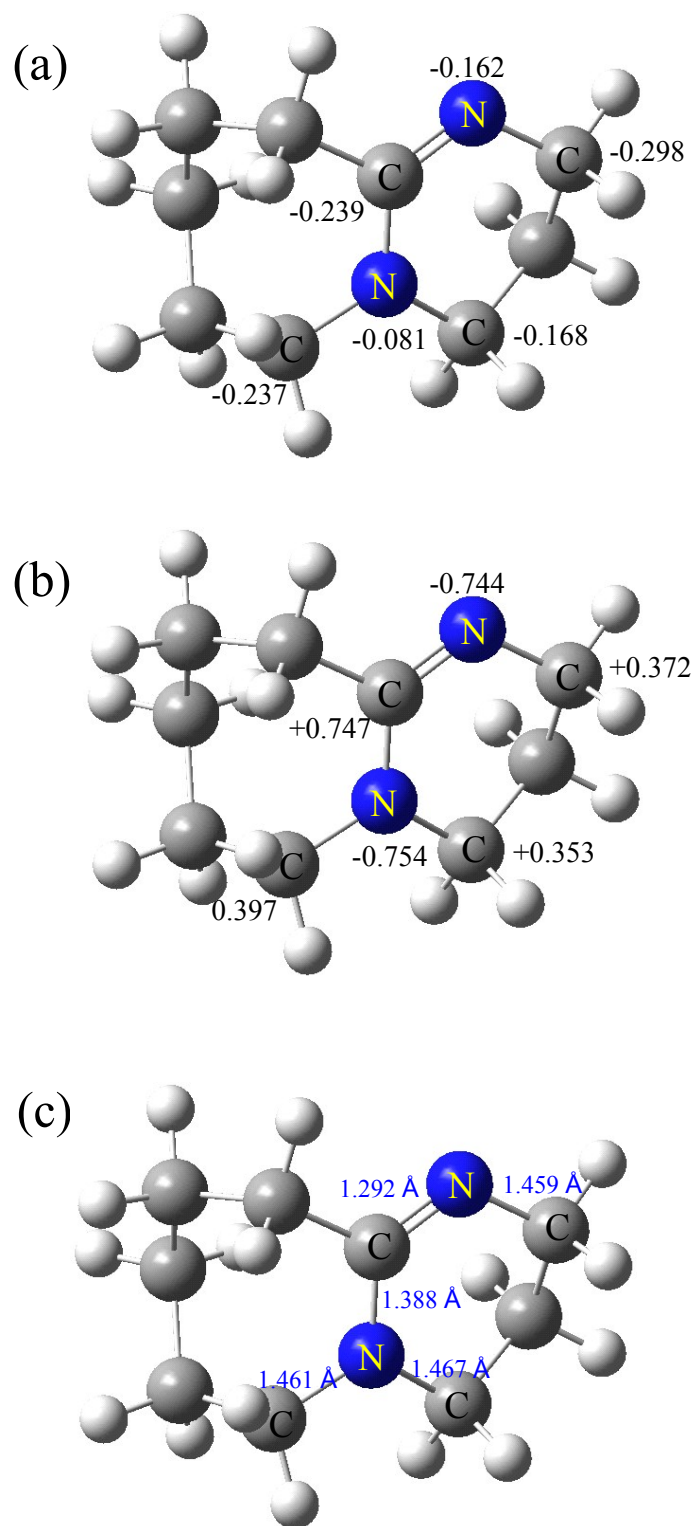

**Figure S3.** Calculated Mulliken charge (a), APT charge (b) and C-N bond length (c) of DBU by DFT B3IYP/6-31++G(d, p) method. Black and blue numbers are charge and bond length, respectively.

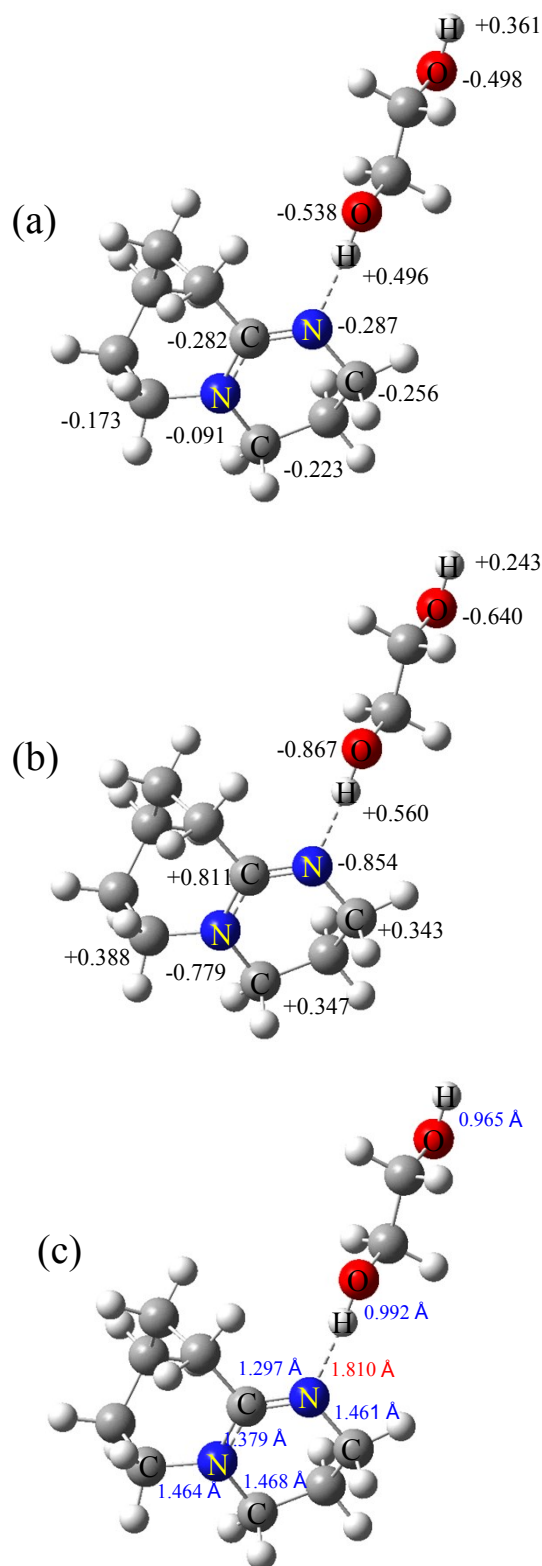

**Figure S4. Calculated Mulliken charge (a), APT charge (b) and bond length (c) of EG:DBU (1:1) by DFT B3IYP/6-31++G(d, p) method. Black, blue and red numbers are charge, intramolecular bond length and intermolecular hydrogen-bond length, respectively. The intermolecular hydrogen-bond is also marked with dashed line.**

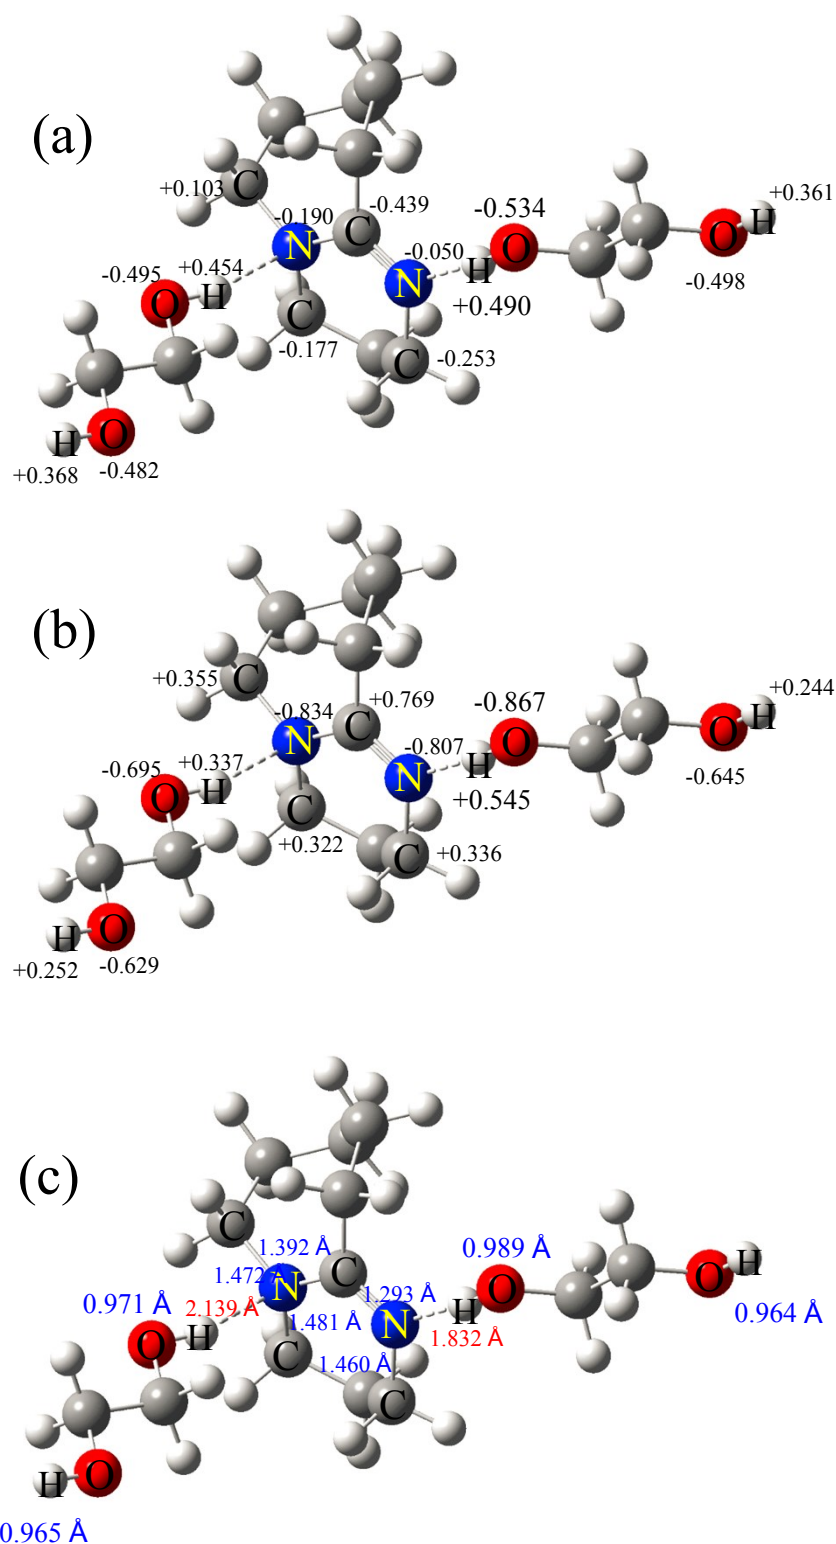

**Figure S5.** Calculated Mulliken charge (a), APT charge (b) and bond length (c) of EG:DBU (2:1) by DFT B3IYP/6-31++G(d, p) method. Black, blue and red numbers are charge, intramolecular bond length and intermolecular hydrogen-bond length, respectively. The intermolecular hydrogen-bond is also marked with dashed line.



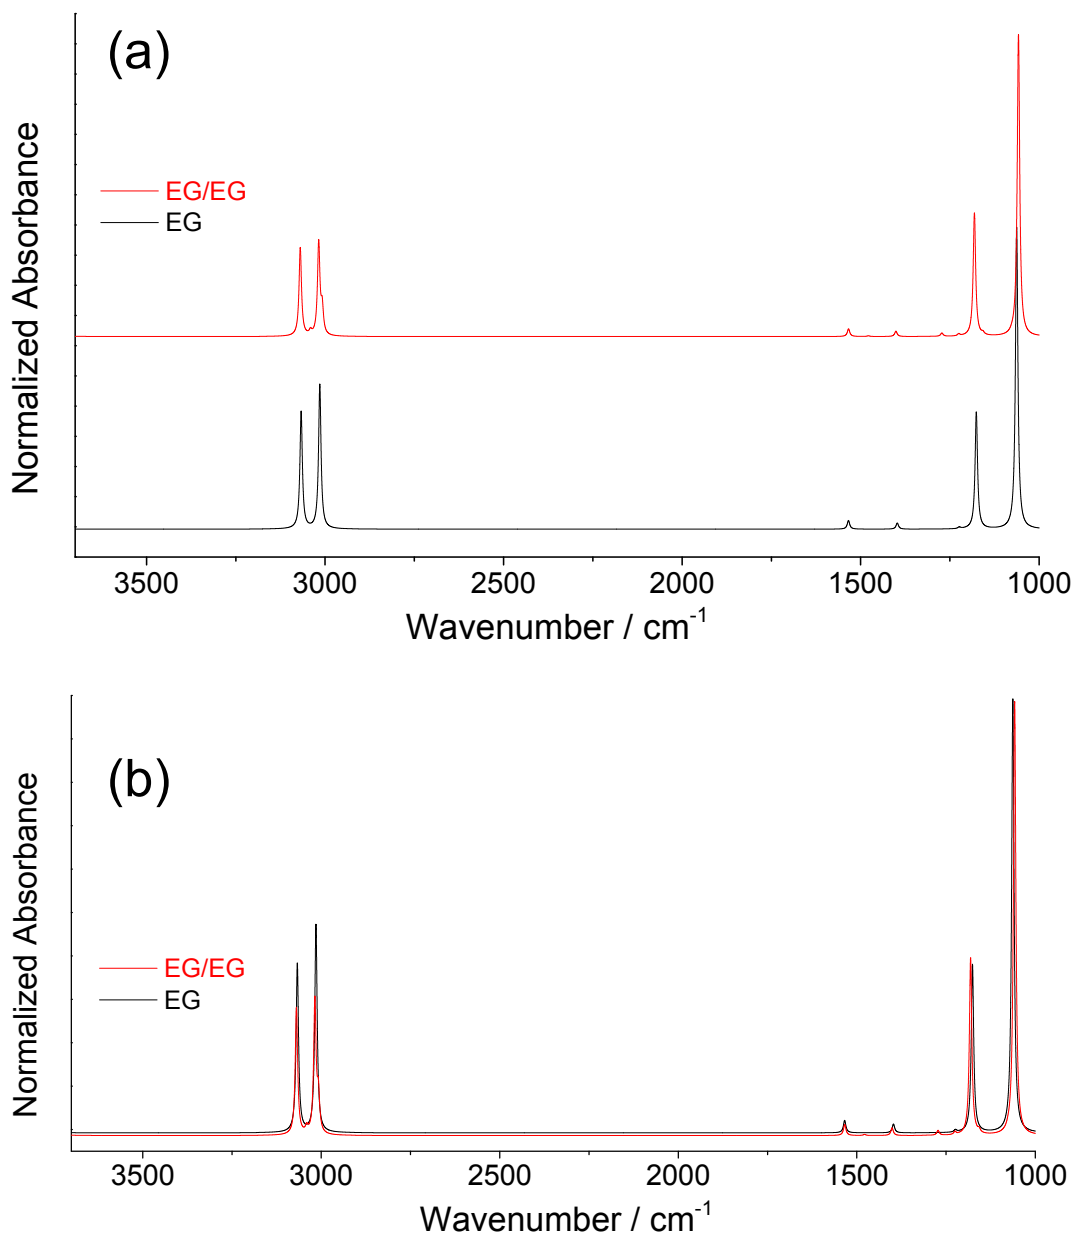

**Figure S6. Comparison of calculated infrared spectra of EG and EG/EG (1:1) by DFT B3LYP/6-31++G(d, p) method. Separate comparison (a) and converged comparison (b).**

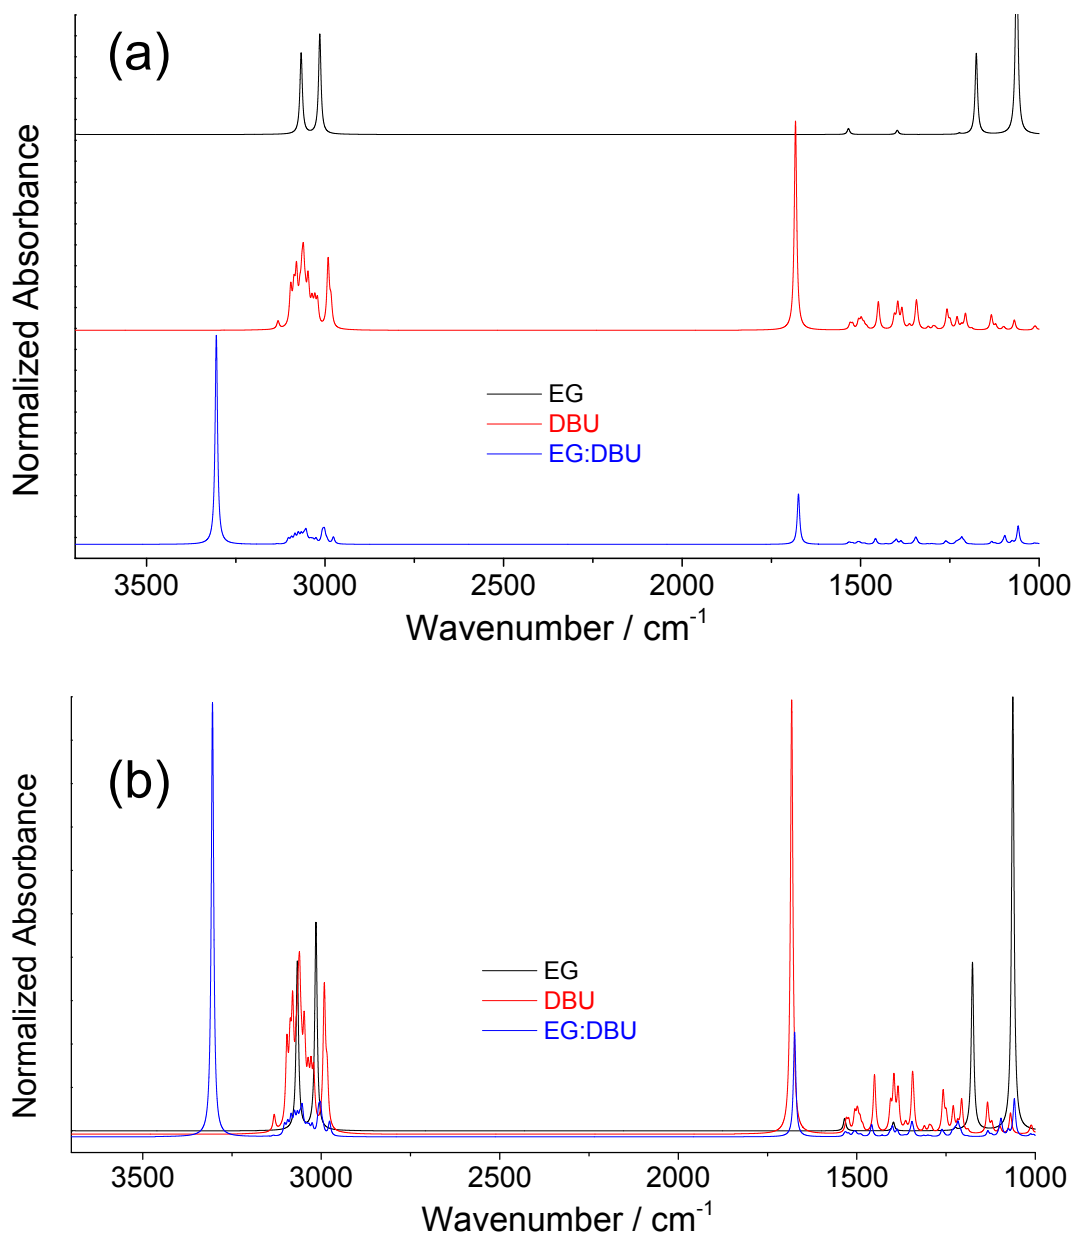

**Figure S7. Comparison of calculated infrared spectra of EG, DBU and EG:DBU (1:1) by DFT B3LYP/6-31++G(d, p) method. Separate comparison (a) and converged comparison (b).**

**Table S9. Cartesian coordinates of all the optimized species by the Gaussian calculation (i.e., output file) for EG by DFT B3LYP/6-31++G(d, p) method.**

---

|                           |             |             |             |
|---------------------------|-------------|-------------|-------------|
| C                         | 0.87645000  | 0.26801800  | 0.00351400  |
| C                         | 1.37248400  | -1.16935300 | -0.00023800 |
| H                         | 1.26045400  | 0.78750600  | -0.88528300 |
| H                         | 1.25809100  | 0.78200500  | 0.89649400  |
| H                         | 0.98847400  | -1.68895000 | 0.88851000  |
| H                         | 0.99090200  | -1.68328500 | -0.89326000 |
| O                         | 2.79961900  | -1.11726600 | 0.00190700  |
| H                         | 3.15015400  | -2.01596200 | -0.00046600 |
| O                         | -0.55074800 | 0.21609900  | 0.00174300  |
| H                         | -0.90103100 | 1.11489400  | -0.00100000 |
|                           |             |             |             |
| 1 2 1.0 3 1.0 4 1.0 9 1.0 |             |             |             |
| 2 5 1.0 6 1.0 7 1.0       |             |             |             |
| 3                         |             |             |             |
| 4                         |             |             |             |
| 5                         |             |             |             |
| 6                         |             |             |             |
| 7 8 1.0                   |             |             |             |
| 8                         |             |             |             |
| 9 10 1.0                  |             |             |             |
| 10                        |             |             |             |

---

**Table S10. Cartesian coordinates of all the optimized species by the Gaussian calculation (i.e., output file) for DBU by DFT B3LYP/6-31++G(d, p) method.**

|   |             |             |             |
|---|-------------|-------------|-------------|
| C | -4.76195000 | -0.60100900 | -0.17140000 |
| C | -2.64371400 | 0.27894600  | 0.34499800  |
| C | -3.31941500 | 1.06879400  | 1.47092400  |
| C | -4.66779500 | 1.59393900  | 0.98099500  |
| H | -1.70286500 | -0.15972300 | 0.69582000  |
| H | -3.47143400 | 0.40575100  | 2.33157500  |
| H | -2.69529700 | 1.90507600  | 1.80578100  |
| H | -5.27159000 | 1.94180200  | 1.82874700  |
| H | -4.52071000 | 2.45767100  | 0.31419600  |
| H | -2.37927100 | 0.96178700  | -0.47864300 |
| C | -6.58882700 | -2.38110800 | 0.32569700  |
| C | -5.65401900 | -1.70009800 | -0.71936000 |
| C | -6.92087600 | -1.54470100 | 1.57400000  |
| C | -7.59430600 | -0.18823200 | 1.30888400  |
| C | -6.86588300 | 0.65166900  | 0.23384200  |
| H | -7.51766800 | -2.68620700 | -0.17359600 |
| H | -4.98080200 | -2.43942800 | -1.15606600 |
| H | -5.99310500 | -1.37260900 | 2.13290300  |
| H | -7.63956100 | 0.36986100  | 2.25307300  |
| H | -6.10823500 | -3.30461700 | 0.66803100  |
| H | -6.25136500 | -1.29469700 | -1.54477000 |
| H | -7.56474700 | -2.13703600 | 2.23596600  |
| H | -8.63393100 | -0.33139200 | 0.98395200  |
| H | -7.12176800 | 1.71077900  | 0.34433200  |
| H | -7.21842800 | 0.36237300  | -0.76083700 |
| N | -3.48525000 | -0.79609100 | -0.16954800 |

N                      -5.40935500      0.54294800      0.27588600

1 12 1.0 26 2.0 27 1.0

2 3 1.0 5 1.0 10 1.0 26 1.0

3 4 1.0 6 1.0 7 1.0

4 8 1.0 9 1.0 27 1.0

5

6

7

8

9

10

11 12 1.0 13 1.0 16 1.0 20 1.0

12 17 1.0 21 1.0

13 14 1.0 18 1.0 22 1.0

14 15 1.0 19 1.0 23 1.0

15 24 1.0 25 1.0 27 1.0

16

17

18

19

20

21

22

23

24

25

26

27

**Table S11. Cartesian coordinates of all the optimized species by the Gaussian calculation (i.e., output file) for EG/EG (1:1) by DFT B3LYP/6-31++G(d, p) method.**

|   |              |             |             |
|---|--------------|-------------|-------------|
| C | -3.23185100  | -0.31344200 | 0.07772400  |
| C | -2.51730800  | -1.65553600 | 0.07320600  |
| H | -3.02738300  | 0.21314300  | -0.86431500 |
| H | -2.85039200  | 0.29780100  | 0.90659000  |
| H | -2.72230600  | -2.17960600 | 1.01698700  |
| H | -2.90004700  | -2.26935800 | -0.75435900 |
| O | -1.12368500  | -1.38478800 | -0.08126200 |
| H | -0.63752300  | -2.21792500 | -0.08655600 |
| O | -4.62693200  | -0.57780000 | 0.23214200  |
| H | -5.11763800  | 0.25600100  | 0.26073800  |
| C | -9.15599500  | 1.31873500  | -0.75002300 |
| C | -8.43752000  | -0.02126800 | -0.75463400 |
| H | -8.96178300  | 1.83843900  | -1.69848600 |
| H | -8.76696400  | 1.93800100  | 0.07052700  |
| H | -8.63090100  | -0.54350200 | 0.19216000  |
| H | -8.82548900  | -0.63798500 | -1.57639500 |
| O | -7.04487400  | 0.24642600  | -0.92447000 |
| H | -6.55218900  | -0.58619400 | -0.95387200 |
| O | -10.54722500 | 1.04479200  | -0.58044100 |
| H | -11.03578800 | 1.87652200  | -0.57506700 |

1 2 1.0 3 1.0 4 1.0 9 1.0

2 5 1.0 6 1.0 7 1.0

3

4

5

6

7 8 1.0

8

9 10 1.0

10

11 12 1.0 13 1.0 14 1.0 19 1.0

12 15 1.0 16 1.0 17 1.0

13

14

15

16

17 18 1.0

18

19 20 1.0

20

---

**Table S12. Cartesian coordinates of all the optimized species by the Gaussian calculation (i.e., output file) for DBU/DBU (1:1) by DFT B3LYP/6-31++G(d, p) method.**

|   |             |             |             |
|---|-------------|-------------|-------------|
| C | -2.50618900 | 0.34087800  | 0.19132900  |
| C | -0.48234000 | -0.08736600 | 1.31833400  |
| C | -1.30533500 | -0.23329000 | 2.60200400  |
| C | -2.40465200 | 0.82683200  | 2.61980300  |
| H | 0.26690900  | -0.88433400 | 1.25268700  |
| H | -1.75551600 | -1.23322400 | 2.62923600  |
| H | -0.67621900 | -0.13114600 | 3.49320000  |
| H | -3.14406500 | 0.59650300  | 3.39664100  |
| H | -1.97916300 | 1.81310600  | 2.86049400  |
| H | 0.07747700  | 0.86123200  | 1.34304400  |
| C | -4.61900900 | -0.60016100 | -0.99953100 |
| C | -3.36602700 | 0.32513900  | -1.05947000 |
| C | -5.13638700 | -0.93709500 | 0.40980900  |
| C | -5.53681200 | 0.26817600  | 1.27648900  |
| C | -4.46466500 | 1.38210200  | 1.30219700  |
| H | -5.42408300 | -0.14647400 | -1.59164600 |
| H | -2.70886500 | 0.00868200  | -1.87078200 |
| H | -4.36212500 | -1.50781400 | 0.93651600  |
| H | -5.73315100 | -0.08469800 | 2.29708900  |
| H | -4.37310800 | -1.54682800 | -1.49379100 |
| H | -3.67204900 | 1.35235700  | -1.29080000 |
| H | -5.99719000 | -1.61082600 | 0.31942700  |
| H | -6.47608700 | 0.70726800  | 0.91404500  |
| H | -4.59959600 | 2.01609200  | 2.18449100  |
| H | -4.59490600 | 2.04163100  | 0.43874500  |
| N | -1.30462400 | -0.13171200 | 0.11192900  |
| N | -3.08972300 | 0.88446500  | 1.32383500  |



|   |             |             |             |
|---|-------------|-------------|-------------|
| C | 2.74100800  | -1.89366400 | -3.25656300 |
| C | 3.51901200  | 0.32519900  | -3.24163700 |
| C | 2.34510000  | 0.65849700  | -2.31492800 |
| C | 1.09946600  | -0.09417200 | -2.77876400 |
| H | 4.43821300  | 0.80722000  | -2.88875500 |
| H | 2.59926500  | 0.35554100  | -1.29140000 |
| H | 2.14131300  | 1.73543900  | -2.29697100 |
| H | 0.32489600  | -0.07113200 | -2.00352200 |
| H | 0.68331300  | 0.38573300  | -3.67899600 |
| H | 3.32230700  | 0.73324900  | -4.24674800 |
| C | 2.68594300  | -4.20937000 | -2.07904200 |
| C | 2.97645600  | -3.38906900 | -3.37238300 |
| C | 1.70800900  | -3.56188500 | -1.08202400 |
| C | 0.30917600  | -3.23831000 | -1.63160900 |
| C | 0.34740800  | -2.47642600 | -2.97611700 |
| H | 2.31976100  | -5.20471100 | -2.36349400 |
| H | 4.02251800  | -3.50475500 | -3.66069300 |
| H | 2.16024300  | -2.63514700 | -0.70828700 |
| H | -0.23453300 | -2.63823200 | -0.89246700 |
| H | 3.63406200  | -4.37132700 | -1.55317600 |
| H | 2.37668300  | -3.77999600 | -4.20312200 |
| H | 1.60482300  | -4.22004500 | -0.20986700 |
| H | -0.26717700 | -4.16260700 | -1.77929900 |
| H | -0.59607900 | -1.94187700 | -3.12560800 |
| H | 0.42810200  | -3.18617900 | -3.80591700 |
| N | 3.76601100  | -1.10955500 | -3.34117900 |
| N | 1.42617900  | -1.49568800 | -3.07878700 |

1 12 1.0 26 2.0 27 1.0

2 3 1.0 5 1.0 10 1.0 26 1.0

3 4 1.0 6 1.0 7 1.0

4 8 1.0 9 1.0 27 1.0

5

6

7

8

9

10

11 12 1.0 13 1.0 16 1.0 20 1.0

12 17 1.0 21 1.0

13 14 1.0 18 1.0 22 1.0

14 15 1.0 19 1.0 23 1.0

15 24 1.0 25 1.0 27 1.0

16

17

18

19

20

21

22

23

24

25

26

27

28 39 1.0 53 2.0 54 1.0

29 30 1.0 32 1.0 37 1.0 53 1.0

30 31 1.0 33 1.0 34 1.0

31 35 1.0 36 1.0 54 1.0

32

33

34

35

36

37

38 39 1.0 40 1.0 43 1.0 47 1.0

39 44 1.0 48 1.0

40 41 1.0 45 1.0 49 1.0

41 42 1.0 46 1.0 50 1.0

42 51 1.0 52 1.0 54 1.0

43

44

45

46

47

48

49

50

51

52

53

54

---

**Table S13. Cartesian coordinates of all the optimized species by the Gaussian calculation (i.e., output file) for EG:DBU (1:1) by DFT B3IYP/6-31++G(d, p) method.**

|   |             |             |             |
|---|-------------|-------------|-------------|
| C | -3.85216900 | 0.71090100  | -0.14791900 |
| C | -1.81449500 | 1.87381100  | 0.16998500  |
| C | -2.42846500 | 2.45647200  | 1.44524000  |
| C | -3.89534300 | 2.79618400  | 1.18943100  |
| H | -0.78304300 | 1.55271200  | 0.35000000  |
| H | -2.35461600 | 1.71654700  | 2.25129800  |
| H | -1.89160000 | 3.35391600  | 1.77116300  |
| H | -4.41355300 | 2.98756300  | 2.13677200  |
| H | -3.97652900 | 3.71209300  | 0.58499100  |
| H | -1.76791500 | 2.64864700  | -0.61089500 |
| C | -5.32101500 | -1.36755800 | 0.37490500  |
| C | -4.64520200 | -0.46000100 | -0.69781500 |
| C | -5.57031300 | -0.71646100 | 1.74667400  |
| C | -6.45158300 | 0.54357500  | 1.73582800  |
| C | -6.02355100 | 1.57453400  | 0.66734800  |
| H | -6.26594900 | -1.74981600 | -0.03148900 |
| H | -3.95444400 | -1.05150400 | -1.30059900 |
| H | -4.60106800 | -0.46431300 | 2.19385600  |
| H | -6.41968500 | 1.00250000  | 2.73226400  |
| H | -4.68210000 | -2.24266300 | 0.53627100  |
| H | -5.40232500 | -0.07006300 | -1.38815800 |
| H | -6.02264900 | -1.45987500 | 2.41420000  |
| H | -7.50096200 | 0.27807600  | 1.55016400  |
| H | -6.40561700 | 2.56812600  | 0.92226100  |
| H | -6.47308500 | 1.31852600  | -0.29641400 |
| N | -2.56854200 | 0.72783100  | -0.33251900 |

|   |             |             |             |
|---|-------------|-------------|-------------|
| N | -4.57368200 | 1.69001000  | 0.50264400  |
| C | -0.52587500 | -2.11022600 | -0.58306300 |
| C | -0.01467300 | -3.40230100 | -1.20192600 |
| H | 0.33613800  | -1.52126300 | -0.23079400 |
| H | -1.14151500 | -2.35533800 | 0.29678500  |
| H | -0.86865900 | -4.00268500 | -1.54597000 |
| H | 0.61206700  | -3.16332800 | -2.07227500 |
| O | 0.73537500  | -4.09862500 | -0.19946800 |
| H | 1.10701300  | -4.89990000 | -0.58674700 |
| O | -1.26776600 | -1.42009300 | -1.57032600 |
| H | -1.70298800 | -0.63181700 | -1.15510800 |

1 12 1.0 26 2.0 27 1.5

2 3 1.0 5 1.0 10 1.0 26 1.0

3 4 1.0 6 1.0 7 1.0

4 8 1.0 9 1.0 27 1.0

5

6

7

8

9

10

11 12 1.0 13 1.0 16 1.0 20 1.0

12 17 1.0 21 1.0

13 14 1.0 18 1.0 22 1.0

14 15 1.0 19 1.0 23 1.0

15 24 1.0 25 1.0 27 1.0

16

17

18

19

20

21

22

23

24

25

26

27

28 29 1.0 30 1.0 31 1.0 36 1.0

29 32 1.0 33 1.0 34 1.0

30

31

32

33

34 35 1.0

35

36 37 1.0

37

---

**Table S14. Cartesian coordinates of all the optimized species by the Gaussian calculation (i.e., output file) for EG:DBU (2:1) by DFT B3IYP/6-31++G(d, p) method.**

|   |             |             |             |
|---|-------------|-------------|-------------|
| C | -4.16278100 | 0.78868400  | 1.11316300  |
| C | -2.67248600 | 2.22241300  | -0.01820600 |
| C | -2.18820000 | 2.69504500  | 1.35463800  |
| C | -3.38510000 | 2.84098800  | 2.29265200  |
| H | -1.82986400 | 2.07906300  | -0.70163900 |
| H | -1.48443700 | 1.95471300  | 1.75291300  |
| H | -1.65663800 | 3.64999000  | 1.28568900  |
| H | -3.04977500 | 2.84584100  | 3.33670100  |
| H | -3.90186700 | 3.79355600  | 2.11592000  |
| H | -3.31903400 | 2.98945500  | -0.47365000 |
| C | -4.51146400 | -1.42509500 | 2.41138800  |
| C | -4.95001500 | -0.50088100 | 1.23357300  |
| C | -3.72727900 | -0.73842000 | 3.54343400  |
| C | -4.46836400 | 0.39828500  | 4.26781300  |
| C | -5.14968900 | 1.39476300  | 3.30772500  |
| H | -5.39908200 | -1.92181800 | 2.82259200  |
| H | -4.83504100 | -1.02805000 | 0.28538700  |
| H | -2.78975400 | -0.34621800 | 3.12926600  |
| H | -3.75896600 | 0.92443300  | 4.91908500  |
| H | -3.87716600 | -2.22008900 | 2.00478300  |
| H | -6.01360000 | -0.25290800 | 1.32385900  |
| H | -3.43161900 | -1.49499100 | 4.27999300  |
| H | -5.24509200 | -0.01053700 | 4.92737600  |
| H | -5.37356900 | 2.33403100  | 3.82274700  |
| H | -6.11359300 | 0.99989800  | 2.97974000  |
| N | -3.40295100 | 0.96220300  | 0.08087200  |
| N | -4.35349100 | 1.73474500  | 2.11672200  |

|   |             |             |             |
|---|-------------|-------------|-------------|
| C | -2.10429000 | -1.46612900 | -2.20250600 |
| C | -2.21009100 | -2.59128400 | -3.22060200 |
| H | -1.43598000 | -0.68742600 | -2.60260800 |
| H | -1.64464000 | -1.85954600 | -1.28221100 |
| H | -2.87221800 | -3.37522400 | -2.82681000 |
| H | -2.65143600 | -2.20000100 | -4.14765100 |
| O | -0.88948300 | -3.09634000 | -3.44822500 |
| H | -0.93006600 | -3.78807000 | -4.11906100 |
| O | -3.41015600 | -0.97074200 | -1.97040200 |
| H | -3.37422400 | -0.26557400 | -1.27847900 |
| C | -8.28118700 | 4.41869800  | -0.36659300 |
| C | -6.93557700 | 3.72053600  | -0.24689200 |
| H | -8.33320600 | 5.23285700  | 0.37001000  |
| H | -9.08444400 | 3.70171400  | -0.14718100 |
| H | -6.89295900 | 2.88351300  | -0.95668500 |
| H | -6.13871800 | 4.43213800  | -0.50682800 |
| O | -6.81326200 | 3.26968900  | 1.10124900  |
| H | -5.98694400 | 2.77061200  | 1.20426200  |
| O | -8.37815300 | 4.91809400  | -1.70152600 |
| H | -9.24093200 | 5.33205900  | -1.82245600 |

1 12 1.0 26 2.0 27 1.0

2 3 1.0 5 1.0 10 1.0 26 1.0

3 4 1.0 6 1.0 7 1.0

4 8 1.0 9 1.0 27 1.0

5

6

7

8

9



10  
11 12 1.0 13 1.0 16 1.0 20 1.0  
12 17 1.0 21 1.0  
13 14 1.0 18 1.0 22 1.0  
14 15 1.0 19 1.0 23 1.0  
15 24 1.0 25 1.0 27 1.0  
16  
17  
18  
19  
20  
21  
22  
23  
24  
25  
26  
27  
28 29 1.0 30 1.0 31 1.0 36 1.0  
29 32 1.0 33 1.0 34 1.0  
30  
31  
32  
33  
34 35 1.0  
35  
36 37 1.0  
37  
38 39 1.0 40 1.0 41 1.0 46 1.0  
39 42 1.0 43 1.0 44 1.0

40

41

42

43

44 45 1.0

45

46 47 1.0

47

---

**Table S15. Comparison of interaction enthalpy energy for EG/EG (1:1), DBU:DBU (1:1), EG:DBU (1:1) and EG:DBU (2:1) via Gaussian calculation by B3LYP/6-31++g(d, p) method.**

| Interaction | Unit                 | EG/EG | DBU/DBU | EG:DBU | EG:DBU |
|-------------|----------------------|-------|---------|--------|--------|
| enthalpy    |                      | (1:1) | (1:1)   | (1:1)  | (2:1)  |
| energy      |                      |       |         |        |        |
| $\Delta E$  | $\text{kJ mol}^{-1}$ | -13.3 | -3.1    | -34.3  | -39.2  |

## References:

- (1) Dionisio, M. S., Ramos, J. J. M. & Goncalves, R. M., The enthalpy and entropy of cavity formation in liquids and corresponding states principle. *Can. J. Chem.* **1990**, 68, 1937-1949.
- (2) Emel'yanenko, V. N., Boeck, G., Verevkin, S. P. & Ludwig, R., Volatile Times for the Very First Ionic Liquid: Understanding the Vapor Pressures and Enthalpies of Vaporization of Ethylammonium Nitrate. *Chem. Eur. J.* **2014**, 20, 11640-11645.
- (3) Garist, I. V., Verevkin, S. P., Bara, J. E., Hindman, M. S. & Danielsen, S. P. O., Building Blocks for Ionic Liquids: Vapor Pressures and Vaporization Enthalpies of 1-(n-Alkyl)-benzimidazoles. *J. Chem. Eng. Data* **2012**, 57, 1803-1809.
- (4) Douglas, T. B., Vapor Pressure of Methyl Sulfoxide from 20 to 50°. Calculation of the Heat of Vaporization. *J. Am. Chem. Soc.* **1948**, 70, 2001-2002.
- (5) M., S. R. & Stanislaw, M., Handbook of the thermodynamics of organic compounds. Richard M. Stephenson, and Stanislaw Malanowski, Elsevier, New York, 1987, 552 pp., \$69.00. *AIChE J.* 35, 877-877.
- (6) Ren, N.-n., Gong, Y.-h., Lu, Y.-z., Meng, H. & Li, C.-x., Surface Tension Measurements for Seven Imidazolium-Based Dialkylphosphate Ionic Liquids and Their Binary Mixtures with Water (Methanol or Ethanol) at 298.15 K and 1 atm. *J. Chem. Eng. Data* **2014**, 59, 189-196.
- (7) <https://macro.lsu.edu/howto/solvents/Vapor%20Pressure.htm> (Accessed: June 3, 2019).
- (8) Guan, W., Tong, J., Chen, S.-P., Liu, Q.-S. & Gao, S.-L., Density and Surface Tension of Amino Acid Ionic Liquid 1-Alkyl-3-methylimidazolium Glutamate. *J. Chem. Eng. Data* **2010**, 55, 4075-4079.
- (9) Zaitsau, D. H., Kabo, G. J., Strechan, A. A., Paulechka, Y. U., Tschersich, A., Verevkin, S. P. & Heintz, A., Experimental vapor pressures of 1-alkyl-3-methylimidazolium bis(trifluoromethylsulfonyl) imides and a correlation scheme for estimation of vaporization enthalpies of ionic liquids. *J. Phys. Chem. A* **2006**, 110, 7303-7306.
- (10) Kurnia, K. A., Mutalib, M. I. A., Man, Z. & Bustam, M. A., Density and Surface Tension of Ionic Liquids [H<sub>2</sub>N-C<sub>2</sub>mim][PF<sub>6</sub>] and [H<sub>2</sub>N-C<sub>3</sub>mim][PF<sub>6</sub>]. *J. Chem. Eng. Data* **2012**, 57, 2923-2927.
- (11) Paulechka, Y. U., Zaitsau, D. H., Kabo, G. J. & Strechan, A. A., Vapor pressure and thermal stability of ionic liquid 1-butyl-3-methylimidazolium Bis(trifluoromethylsulfonyl)amide. *Thermochim. Acta.* **2005**, 439, 158-160.
- (12) Liu, Q.-S., Tong, J., Tan, Z.-C., Welz-Biermann, U. & Yang, J.-Z., Density and Surface Tension of

Ionic Liquid [C<sub>2</sub>mim][PF<sub>3</sub>(CF<sub>2</sub>CF<sub>3</sub>)<sub>3</sub>] and Prediction of Properties [C<sub>n</sub>mim][PF<sub>3</sub>(CF<sub>2</sub>CF<sub>3</sub>)<sub>3</sub>] (n=1, 3, 4, 5, 6). *J. Chem. Eng. Data* **2010**, 55, 2586-2589.

(13) Tong, J., Qu, Y., Jing, L., Liu, L. & Liu, C., Measurement of Vapor Pressure and Vaporization Enthalpy for Ionic Liquids 1-Hexyl-3-methylimidazolium Threonine Salt C(6)mim Thr by Isothermogravimetric Analysis. *Acta Phys-Chim. Sin.* **2018**, 34, 194-200.

(14) Zhang, Z., Wei, J., Ma, X., Xu, W., Tong, J., Guan, W. & Yang, J., The measurement of vapor pressure, enthalpy of vaporization and the prediction of the polarity for 1-propyl-3-methylimidazolium acetate C<sub>3</sub>mim OAc ionic liquid. *Scientia Sinica Chimica* **2014**, 44, 1005-1013.

(15) Yu, G., Chen, X., Asumana, C., Zhang, S., Liu, X. & Zhou, G., Vaporization Enthalpy and Cluster Species in Gas Phase of 1,1,3,3-Tetramethylguanidinium-Based Ionic Liquids from Computer Simulations. *AIChE J.* **2011**, 57, 507-516.

(16) Ludwig, R. & Kragl, U., Do we understand the volatility of ionic liquids? *Angew. Chem. Int. Ed.* **2007**, 46, 6582-6584.

(17) Zaitsau, D. H., Emel'yanenko, V. N., Stange, P., Schick, C., Verevkin, S. P. & Ludwig, R., Dispersion and Hydrogen Bonding Rule: Why the Vaporization Enthalpies of Aprotic Ionic Liquids Are Significantly Larger than those of Protic Ionic liquids. *Angew. Chem. Int. Ed.* **2016**, 55, 11682-11686.

(18) Heym, F., Korth, W., Thiessen, J., Kern, C. & Jess, A., Evaporation and Decomposition Behavior of Pure and Supported Ionic Liquids under Thermal Stress. *Chem. Ing. Tech.* **2015**, 87, 791-802.

(19) Zaitsau, D. H., Fumino, K., Emel'yanenko, V. N., Yermalayeu, A. V., Ludwig, R. & Verevkin, S. P., Structure-Property Relationships in Ionic Liquids: A Study of the Anion Dependence in Vaporization Enthalpies of Imidazolium-Based Ionic Liquids. *ChemPhysChem* **2012**, 13, 1868-1876.

(20) Ribeiro, F. M. S., Lima, C. F. R. A. C., Vaz, I. C. M., Rodrigues, A. S. M. C., Sapei, E., Melo, A., Silva, A. M. S. & Santos, L. M. N. B. F., Vaporization of protic ionic liquids derived from organic superbases and short carboxylic acids. *Phys. Chem. Chem. Phys.* **2017**, 19, 16693-16701.

(21) Zaitsau, D. H., Yermalayeu, A. V., Emel'yanenko, V. N., Verevkin, S. P., Welz-Biermann, U. & Schubert, T., Structure-property relationships in ILs: A study of the alkyl chain length dependence in vaporisation enthalpies of pyridinium based ionic liquids. *Sci. China Chem.* **2012**, 55, 1525-1531.

(22) Yermalayeu, A. V., Zaitsau, D. H., Loor, M., Schaumann, J., Emel'yanenko, V. N., Schulz, S. & Verevkin, S. P., Imidazolium Based Ionic Liquids: Impact of the Cation Symmetry and Alkyl Chain Length on the Enthalpy of Vaporization. *Z. Anorg. Allg. Chem.* **2017**, 643, 81-86.

(23) Shahbaz, K., Mjalli, F. S., Vakili-Nezhaad, G., AlNashef, I. M., Asadov, A. & Farid, M. M., Thermogravimetric measurement of deep eutectic solvents vapor pressure. *J. Mol. Liq.* **2016**, 222, 61-66.

(24) Frisch, M. J., Trucks, G. W., Schlegel, H. B., Scuseria, G. E., Robb, M. A., Cheeseman, J. R., Scalmani, G., Barone, V., Mennucci, B., Petersson, G. A., Nakatsuji, H., Caricato, M., Li, X. Y., Hratchian, H. P., Izmaylov, A. F., Bloino, J., Zheng, G., Sonnenberg, J. L., Hada, M., Ehara, M., Toyota, K., Fukuda, R., Hasegawa, J., Ishida, M., Nakajima, T., Honda, Y., Kitao, O., Nakai, H., Vreven, T., Montgomery, J., A., J., Peralta, J. E., Ogliaro, F., Bearpark, M., Heyd, E., Brothers, J. J., Kudin, K. N., Staroverov, V. N., Kobayashi, R., Normand, J., Raghavachari, K., Rendell, A., Burant, J. C., Iyengar, S. S., Tomasi, J., Cossi, M., Rega, N., Millam, J. M., Klene, M., Knox, J. E., Cross, J. B., Bakken, V., Adamo, C., Jaramillo, R., Gomperts, R. E. Stratmann, Yazyev, O., Austin, A. J., Cammi, R., Pomelli, C., Ochterski, J. W., Martin, R. L., Morokuma, K., Zakrzewski, V. G., Voth, G. A., Salvador, P., Dannenberg, J. J., Dapprich, S., Daniels, A. D., Farkas, O., Foresman, J. B., Ortiz, J. V., Cioslowski, J. & Fox, D. J., Gaussian, Inc., Wallingford CT. *Gaussian 09, Revision A.02* **2009**.
